# Supplementary material for: Fungal Naphthalenones; Promising Metabolites for Drug Discovery: Structures, Biosynthesis, Sources, and Pharmacological Potential
Source: MDPI journal article supplement (doi:10.3390/toxins14020154), 2022-02-19
Supplement: s1 [file s1]

---

*Review*

# **Fungal Naphthalenones; Promising Metabolites for Drug Discovery: Structures, Biosynthesis, Sources, and Pharmacological Potential**

Sabrin R. M. Ibrahim, Sana A. Fadil, Haifa A. Fadil, Bayan A. Eshmawi, Shaimaa G. A. Mohamed and Gamal A. Mohamed

**Table S1.** List of fungal naphthalenones (Fungal source, host, and place).

| Compound name                                                                                                                                                                               | Mol. Wt. | Mol. formula                                   | Fungal source                                                                                                      | Host (part, family)                                                          | Location                       | Ref.  |
|---------------------------------------------------------------------------------------------------------------------------------------------------------------------------------------------|----------|------------------------------------------------|--------------------------------------------------------------------------------------------------------------------|------------------------------------------------------------------------------|--------------------------------|-------|
| 3,4-Dihydro-3,4,8-trihydroxy-1(2H)-naphthalenone (= 3,4-Dihydro-3,4,8-trihydroxy-1(2H)-naphthalenone = (3S,4S)-3,4,8-Trihydroxy-3,4-dihydro-1(2H)-naphthalenone = 3-Hydroxyisosclerone) (1) | 194      | C <sub>10</sub> H <sub>10</sub> O <sub>4</sub> | <i>Pyricularia oryzae</i> Cav. Ken 53-33                                                                           | Rice blast                                                                   | Japan                          | [33]  |
|                                                                                                                                                                                             |          |                                                | <i>Ceratocystis minor</i> (Hedgc.) Hunt                                                                            | <i>Dendroctonus frontalis</i> (Insect, Scolytidae)                           | Southern USA                   | [118] |
|                                                                                                                                                                                             |          |                                                | <i>Verticillium dahlia</i> brm-2 mutant                                                                            | Cultured                                                                     | USA                            | [119] |
|                                                                                                                                                                                             |          |                                                | <i>Leptographium wagenieri</i> RH50 (Kendr) var. <i>pserrabtsugae</i> = <i>Verticicladzella wagenieri</i> Kendrick | <i>Pseudotsuga menziesii</i> (Douglas fir, Pinaceae)                         | USA                            | [120] |
|                                                                                                                                                                                             |          |                                                | <i>Hypoxylon mammarum</i>                                                                                          | <i>Populus tremula</i> (Canker margin of infected quaking aspen, Salicaceae) | France                         | [121] |
|                                                                                                                                                                                             |          |                                                | <i>Tubakia dryina</i> (Sacc.) PV-6                                                                                 | -                                                                            | East of Mississippi River, USA | [63]  |
|                                                                                                                                                                                             |          |                                                | <i>Scolecotrichum graminis</i> Fuckel                                                                              | Cultured                                                                     | Japan                          | [122] |
|                                                                                                                                                                                             |          |                                                | <i>Ceratocystis fimbriata coffea</i>                                                                               | <i>Coffea arabica</i> (Canker disease, Rubiaceae)                            | China                          | [41]  |
|                                                                                                                                                                                             |          |                                                | <i>Nigrospora</i> sp. PSU-F5                                                                                       | <i>Annella</i> sp. (Gorgonian Sea fan, Gorgoniidae)                          | Near Similan Island, Thailand  | [123] |
|                                                                                                                                                                                             |          |                                                | <i>Daldinia eschscholzii</i>                                                                                       | <i>Mantis religiosa</i> (Mantis, Mantidae)                                   | China                          | [27]  |
|                                                                                                                                                                                             |          |                                                | <i>Xylariaceae</i> sp. CR1546C                                                                                     | <i>Sticta fuliginosa</i> (Lichen, Lobariaceae)                               | Costa Rica                     | [63]  |
|                                                                                                                                                                                             |          |                                                | <i>Aureobasidium pullulans</i>                                                                                     | <i>Aloe vera</i> (Leaves, Asphodelaceae)                                     | Marrakesh, Morocco             | [84]  |
|                                                                                                                                                                                             |          |                                                | <i>Xylariales</i> sp. PSU-ES163                                                                                    | <i>Halophila ovalis</i> (Seagrass leaves, Hydrocharitaceae)                  | Trang, Thailand                | [124] |
|                                                                                                                                                                                             |          |                                                | <i>Alternaria</i> sp. A744                                                                                         | <i>Morinda officinalis</i> (Twigs, Rubiaceae)                                | Gaoyao city, Guangdong, China  | [82]  |

|                                                                                                                                                                                                             |     |                                                |                                                 |                                                        |                                              |       |
|-------------------------------------------------------------------------------------------------------------------------------------------------------------------------------------------------------------|-----|------------------------------------------------|-------------------------------------------------|--------------------------------------------------------|----------------------------------------------|-------|
|                                                                                                                                                                                                             |     |                                                | <i>Cladosporium</i> sp. JJM22                   | <i>Ceriops tagal</i> (Mangrove plant, Rhizophoraceae)  | Dongzhaigang, Hainan, China                  | [65]  |
|                                                                                                                                                                                                             |     |                                                | <i>Cladosporium</i> sp. JJM22                   | <i>Ceriops tagal</i> (Mangrove plant, Rhizophoraceae)  | South China Sea, Dongzhaigang, Hainan, China | [65]  |
|                                                                                                                                                                                                             |     |                                                | <i>Cladosporium</i> sp. HDN17-58                | Deep-sea sediment                                      | Western Pacific Ocean, China                 | [125] |
| <i>trans</i> -3,4,8-Trihydroxy-1(2 <i>H</i> )-naphthalenone (= (+)- <i>trans</i> -3,4-Dihydro-3,4,8-trihydroxy-1(2 <i>H</i> )-naphthalenone = (3 <i>S</i> ,4 <i>S</i> )-4-Hydroxy-6-dehydroxyscytalone) (2) | 194 | C <sub>10</sub> H <sub>10</sub> O <sub>4</sub> | <i>Pyricularia oryzae</i> Cav. (Ken 53-33)      | Rice blast                                             | Japan                                        | [126] |
|                                                                                                                                                                                                             |     |                                                | <i>Lachnellula</i> sp. A 32-89                  | <i>Polylepis sericea</i> (Bark, Rosaceae)              | Laguna Negra, Venezuela.                     | [35]  |
|                                                                                                                                                                                                             |     |                                                | <i>Massarina</i> sp.                            | <i>Leptogium hildenbrandii</i> (Lichen, Collemataceae) | Lijiang City, Yunnan, China                  | [62]  |
|                                                                                                                                                                                                             |     |                                                | <i>Daldinia eschscholtzii</i>                   | <i>Paphiopedilum exul</i> (Orchid, roots, Orchidaceae) | Chiang Mai, Thailand                         | [21]  |
|                                                                                                                                                                                                             |     |                                                | <i>Pyricularia grisea</i>                       | <i>Cenchrus ciliaris</i> (Buffelgrass, Poaceae)        | Saguaro National Monument, Arizona, USA      | [34]  |
|                                                                                                                                                                                                             |     |                                                | <i>Penicillium polonicum</i> AP2T1              | <i>Isurus oxyrinchus</i> (Gills of shark, Lamnidae)    | China                                        | [127] |
|                                                                                                                                                                                                             |     |                                                | <i>Xenomyrothecium</i> sp. IMBCFP2.11           | Unidentified sponge                                    | Quang Nam sea, Vietnam                       | [128] |
|                                                                                                                                                                                                             |     |                                                | <i>Penicillium</i> sp. KMM 4672                 | <i>Padina</i> sp. (Brown alga, Dictyotaceae)           | Van Phong Bay, South China Sea, Vietnam      | [113] |
| (3 <i>R</i> ,4 <i>S</i> )-3,4,8-Trihydroxy-3,4-dihydronaphthalen-1(2 <i>H</i> )-one (= (3 <i>R</i> ,4 <i>S</i> )-(+)-4-hydroxy-6-deoxyscytalone) (3)                                                        | 194 | C <sub>10</sub> H <sub>10</sub> O <sub>4</sub> | <i>Pyricularia oryzae</i> Cav. (Ken 53-33)      | Rice blast                                             | Japan                                        | [129] |
|                                                                                                                                                                                                             |     |                                                | <i>Sclerotinia sclerotiorum</i> (LIB.) DE BARY. | Cultured                                               | Japan                                        | [37]  |
|                                                                                                                                                                                                             |     |                                                | <i>Fusidium</i> sp.                             | <i>Mentha arvensis</i> (Leaves, Lamiaceae)             | Hahausen, Lower Saxony, Germany              | [130] |

|                                                                                                                                      |     |                                                |                                                     |                                                           |                                                                            |       |
|--------------------------------------------------------------------------------------------------------------------------------------|-----|------------------------------------------------|-----------------------------------------------------|-----------------------------------------------------------|----------------------------------------------------------------------------|-------|
|                                                                                                                                      |     |                                                | <i>Pseudobotrytis</i> sp. FKA-25                    | Forest soil                                               | Yakushima, Kagoshima Prefecture, Japan,                                    | [131] |
|                                                                                                                                      |     |                                                | <i>Colletotrichum gloeosporioides</i>               | <i>Cryptocarya mandioccana</i> (Leaves, Lauraceae)        | Cerrado and Atlantic Forest, Brazil                                        | [55]  |
|                                                                                                                                      |     |                                                | <i>Colletotrichum acutatum</i> IMI 348489           | <i>Fragaria ananassa</i> (Strawberry plant, Rosaceae)     | France                                                                     |       |
|                                                                                                                                      |     |                                                | <i>Colletotrichum acutatum</i> IMI 364856           | <i>Fragaria ananassa</i> (Strawberry plant, Rosaceae)     | Spain                                                                      |       |
|                                                                                                                                      |     |                                                | <i>Colletotrichum. acutatum</i> UCA 1028            | <i>Fragaria ananassa</i> (Strawberry plant, Rosaceae)     | Conil, Cádiz                                                               | [132] |
|                                                                                                                                      |     |                                                | <i>Botrytis fabae</i> Bf-CO-05                      | <i>Vicia faba</i> (Bean, Fabaceae)                        | Cordoba field, Institute for Sustainable Agriculture, CSIC, Cordoba, Spain | [44]  |
|                                                                                                                                      |     |                                                | <i>Embellisia eureka</i>                            | Cultured                                                  | Germany                                                                    | [133] |
|                                                                                                                                      |     |                                                | <i>Xylariaceae</i> sp. SCSGAF0086                   | <i>Melitodes squamata</i> (Gorgonian coral, Melithaeinae) | South China Sea, China                                                     | [134] |
|                                                                                                                                      |     |                                                | <i>Xylariaceae</i> sp. CR1546C                      | <i>Sticta fuliginosa</i> (Lichen, Lobariaceae)            | Costa Rica                                                                 | [63]  |
| (2S,4S)-3,4-Dihydro-2,4,8-trihydroxy-1(2H)-naphthalenone (= (-)- <i>trans</i> -3,4-Dihydro-2,4,8-trihydroxynaphthalen-1(2H)-one) (4) | 194 | C <sub>10</sub> H <sub>10</sub> O <sub>4</sub> | <i>Urnula craterium</i> (Schw.: Fr.)                | Cultured                                                  | Canada                                                                     | [36]  |
|                                                                                                                                      |     |                                                | <i>Ceratocystis fimbriata</i> f. sp. <i>platani</i> | Cultured                                                  | Madonna del Piano, Ticino, Switzerland                                     | [39]  |
|                                                                                                                                      |     |                                                | <i>Botrytis fabae</i> Bf-CO-05                      | <i>Vicia faba</i> (Bean, Fabaceae)                        | Cordoba field, Institute for Sustainable Agriculture, CSIC, Cordoba, Spain | [44]  |

|                                                                                                                                              |     |                                                |                                                                           |                                                       |                                         |       |
|----------------------------------------------------------------------------------------------------------------------------------------------|-----|------------------------------------------------|---------------------------------------------------------------------------|-------------------------------------------------------|-----------------------------------------|-------|
|                                                                                                                                              |     |                                                | <i>Alternaria</i> sp. A744                                                | <i>Morinda officinalis</i> (Twigs, Rubiaceae)         | Gaoyao city, Guangdong, China           | [82]  |
|                                                                                                                                              |     |                                                | <i>Leptosphaerulina chartarum</i> 3608                                    | Crinoid (Marine animal, Crinoidea)                    | Xuwen, Zhanjiang City, Guangdong, China | [91]  |
| (-)- <i>trans</i> -3,4-Dihydro-2,4,8-trihydroxynaphthalen-1(2 <i>H</i> )-one (5)                                                             | 194 | C <sub>10</sub> H <sub>10</sub> O <sub>4</sub> | <i>Ceratocystis fimbriata</i> f. sp. <i>platani</i>                       | Cultured                                              | Madonna del Piano, Ticino, Switzerland  | [39]  |
| (+)- <i>cis</i> -3,4-Dihydro-2,4,8-trihydroxynaphthalen-1(2 <i>H</i> )-one (6)                                                               | 194 | C <sub>10</sub> H <sub>10</sub> O <sub>4</sub> | <i>Leptosphaerulina chartarum</i> 3608                                    | Crinoid (Marine animal, Crinoidea)                    | Xuwen, Zhanjiang City, Guangdong, China | [91]  |
| (2 <i>S</i> ,4 <i>R</i> )-2,4,8-Trihydroxy-3,4-dihydronaphthalen-1(2 <i>H</i> )-one (7)                                                      | 194 | C <sub>10</sub> H <sub>10</sub> O <sub>4</sub> | <i>Mycosphaerella fijiensis</i> IMI 105378                                | <i>Musa sapientum</i> (Musaceae)                      | San Pedro Sula, Honduras                | [40]  |
| Sclerone (= (4 <i>R</i> )-(-)-Regiolone = (4 <i>R</i> )-3,4-Dihydro-4,8-dihydroxy-1(2 <i>H</i> )-naphthalenone = 4,8-Dihydroxytetralone) (8) | 178 | C <sub>10</sub> H <sub>10</sub> O <sub>3</sub> | <i>Sclerotinia sclerotiorum</i> (LIB.) DE BARY                            | Cultured                                              | Japan                                   | [37]  |
|                                                                                                                                              |     |                                                | <i>Scytalidium</i> sp.                                                    | Cultured                                              | Japan                                   | [57]  |
|                                                                                                                                              |     |                                                | <i>Verticillium dahlia</i> brm-2 mutant                                   | Cultured                                              | USA                                     | [119] |
|                                                                                                                                              |     |                                                | <i>Penicillium diversum</i> var. <i>aureum</i>                            | Cultured                                              | Japan                                   | [83]  |
|                                                                                                                                              |     |                                                | <i>Discula</i> sp.                                                        | <i>Cornus florida</i> (Cornaceae)                     | North Carolina and Georgia, USA         | [135] |
|                                                                                                                                              |     |                                                | <i>Cladosporium cladosporioides</i><br><i>Cladosporium sphaerospermum</i> | <i>Cryptocarya mandioccana</i> (Leaves, Lauraceae)    | Cerrado and Atlantic Forest, Brazil     | [55]  |
|                                                                                                                                              |     |                                                | <i>Caryospora callicarpa</i> YMF1.01026                                   | Submerged woody substrate, freshwater                 | Yunnan Province, China                  | [52]  |
|                                                                                                                                              |     |                                                | <i>Colletotrichum acutatum</i> IMI 348489                                 | <i>Fragaria ananassa</i> (Strawberry plant, Rosaceae) | France                                  |       |

|                                                                                                                               |     |                                                |                                                    |                                                           |                                              |       |
|-------------------------------------------------------------------------------------------------------------------------------|-----|------------------------------------------------|----------------------------------------------------|-----------------------------------------------------------|----------------------------------------------|-------|
|                                                                                                                               |     |                                                | <i>Colletotrichum acutatum</i> IMI 364856          | <i>Fragaria ananassa</i> (Strawberry plant, Rosaceae)     | Spain                                        | [132] |
|                                                                                                                               |     |                                                | <i>Colletotrichum acutatum</i> UCA 1028            | <i>Fragaria ananassa</i> (Strawberry plant, Rosaceae)     | Conil, Cádiz                                 |       |
|                                                                                                                               |     |                                                | <i>Coniothyrium</i> sp. 193H77                     | <i>Ectyplasia perox</i> (Marine sponges)                  | Caribbean Sea, Dominica                      | [136] |
|                                                                                                                               |     |                                                | <i>Daldinia eschscholzii</i>                       | <i>Mantis religiosa</i> (Mantis, Mantidae)                | China                                        | [27]  |
|                                                                                                                               |     |                                                | <i>Xylariaceae</i> sp. SCSGAF0086                  | <i>Melitodes squamata</i> (Gorgonian coral, Melithaeinae) | South China Sea, China                       | [134] |
|                                                                                                                               |     |                                                | <i>Phialocephala fortinii</i>                      | <i>Pamelia</i> sp. (Lichen, Parmeliaceae)                 | Mount Qingliang, Zhejiang, China             | [137] |
|                                                                                                                               |     |                                                | <i>Pestalotiopsis</i> sp. EJC07                    | <i>Bauhinia guianensis</i> (Fabaceae)                     | Belém-PA, Brasil                             | [138] |
|                                                                                                                               |     |                                                | <i>Colletotrichum aotearoa</i> 09F0161             | <i>Bredia oldhamii</i> (Leaves, Melastomataceae)          | Taiwan                                       | [139] |
|                                                                                                                               |     |                                                | <i>Cladosporium cladosporioides</i> HDN14-342      | Sediment                                                  | Indian Ocean, Qingdao, China                 | [95]  |
|                                                                                                                               |     |                                                | <i>Colletotrichum</i> sp. GDMU-1                   | <i>Santalum album</i> (Leaves, Santalaceae)               | Dongguan, Guangdong, China                   | [112] |
|                                                                                                                               |     |                                                | <i>Cladosporium</i> sp. JJM22                      | <i>Ceriops tagal</i> (Mangrove plant, Rhizophoraceae)     | South China Sea, Dongzhaigang, Hainan, China | [65]  |
| 4(S)-(+)-Isosclerone (= (4S)-3,4-Dihydro-4,8-dihydroxy-1(2H)-naphthalenone = (-)-(4S)-4,8-Dihydroxy- $\alpha$ -tetralone) (9) | 178 | C <sub>10</sub> H <sub>10</sub> O <sub>3</sub> | <i>Sclerotinia sclerotiorum</i> (LIB.) DE BARY     | Cultured                                                  | Japan                                        | [37]  |
|                                                                                                                               |     |                                                | <i>Penicillium diversum</i> var. <i>aureum</i>     | Cultured                                                  | Japan                                        | [83]  |
|                                                                                                                               |     |                                                | <i>Pyricularia oryzae</i> Cav. (Ken 53-33)         | Rice blast                                                | Japan                                        | [126] |
|                                                                                                                               |     |                                                | <i>Tubakia dryina</i> (Sacc.) PV-6                 | East of the Mississippi River                             | USA                                          | [63]  |
|                                                                                                                               |     |                                                | <i>Scolecotrichum graminis</i> Fuckel              | Cultured                                                  | Japan                                        | [122] |
|                                                                                                                               |     |                                                | <i>Phaeoacremonium aleophilum</i> (Pal) PVFi69-257 | <i>Vitis vinifera</i> (Grapevine, Vitaceae)               | Italy                                        | [42]  |

|                                         |                                                                        |                                                                            |       |
|-----------------------------------------|------------------------------------------------------------------------|----------------------------------------------------------------------------|-------|
| <i>Urnula craterium</i> (Schw.: Fr.)    | Cultured                                                               | Canada                                                                     | [36]  |
| <i>Cytospora eucalypticola</i>          | <i>Eucalyptus perriniana</i> (Spinning gum bark, Myrtaceae)            | Royal Botanic Gardens, Kew, UK                                             | [140] |
| <i>Xylariaceous</i> sp. PSU-A80         | <i>Garcinia atroviridis</i> (Leaves, Clusiaceae)                       | Songkhla Province, Thailand                                                | [97]  |
| <i>Caryospora callicarpa</i> YMF1.01026 | Submerged woody substrate, freshwater                                  | Yunnan Province, China                                                     | [52]  |
| <i>Phaeosphaeria</i> sp.                | <i>Bambusa vulgaris</i> (Decaying bamboo stem, Poaceae)                | Queen Sirikit Botanic Garden, Chiang Mai, Thailand                         | [61]  |
| <i>Papulaspora immersa</i>              | <i>Smallanthus sonchifolius</i> (Leaves and roots, Asteraceae)         | Ribeirão Preto, São Paulo State, Brazil.                                   | [141] |
| <i>Neofusicoccum parvum</i>             | <i>Vitis vinifera</i> cv. <i>Parellada</i> (Cankered branch, Vitaceae) | Catalonia, NE, Spain                                                       | [142] |
| <i>Botrytis fabae</i> Bf-CO-05          | <i>Vicia faba</i> (Bean, Fabaceae)                                     | Cordoba field, Institute for Sustainable Agriculture, CSIC, Cordoba, Spain | [44]  |
| <i>Paraphoma radicina</i> G104          | Submerged wood, freshwater lake                                        | Greensboro, North Carolina, USA                                            | [143] |
| <i>Aspergillus fumigatus</i>            | Marine green algae, surface                                            | Seosaeng-myeon, Ulsan, Korea                                               | [58]  |
| <i>Scytalidium album</i> MSX51631       | Cultured                                                               | Cobb County, GA, USA                                                       | [59]  |
| <i>Daldinia eschscholtzii</i> PSUSTD57  | <i>Bruguiera gymnorrhiza</i> (Mangrove plant leaves, Rhizophoraceae)   | Suratthani, Thailand                                                       | [64]  |

|                                   |     |                                                |                                               |                                                                |                                            |       |
|-----------------------------------|-----|------------------------------------------------|-----------------------------------------------|----------------------------------------------------------------|--------------------------------------------|-------|
|                                   |     |                                                | <i>Neofusicoccum parvum</i> B19               | <i>Vitis vinifera</i> (Declining vines of grapevine, Vitaceae) | Inzolia, Sicily                            | [46]  |
|                                   |     |                                                | <i>Xylariales</i> sp. PSU-ES163               | <i>Halophila ovalis</i> (Seagrass leaves, Hydrocharitaceae)    | Trang, Thailand                            | [124] |
|                                   |     |                                                | <i>Cladosporium cladosporioides</i> HDN14-342 | Sediment                                                       | Indian Ocean, Qingdao, China               | [95]  |
|                                   |     |                                                | <i>Pyricularia grisea</i>                     | <i>Cenchrus ciliaris</i> (Buffelgrass, Poaceae)                | Saguaro National Monument, Arizona, USA    | [47]  |
|                                   |     |                                                | <i>Alternaria</i> sp. A744                    | <i>Morinda officinalis</i> (Twigs, Rubiaceae)                  | Gaoyao city, Guangdong, China              | [82]  |
|                                   |     |                                                | <i>Cytospora eugeniae</i> BCC42696            | <i>Arenga pinnata</i> (Petiole, Arecaceae)                     | Oil palm garden, Trang, Thailand           | [144] |
|                                   |     |                                                | <i>Pleosporales</i> sp. F46                   | <i>Mahonia fortune</i> (Pedicel, Berberidaceae)                | Qingdao, China                             | [145] |
|                                   |     |                                                | <i>Scytalidium thermophilum</i> YMF 1.04054   | Soil                                                           | Hotspring National Park, Yunnan, China     | [146] |
|                                   |     |                                                | <i>Cladosporium</i> sp. JJM22                 | <i>Ceriops tagal</i> (Mangrove plant, Rhizophoraceae)          | Dongzhaigang, Hainan, China                | [65]  |
| 4(S)-(+)-Isosclerone acetate (10) | 220 | C <sub>12</sub> H <sub>12</sub> O <sub>4</sub> | <i>Cytospora</i> sp.                          | <i>Ilex canariensis</i> (Aquifoliaceae)                        | Gomera, Spain                              | [60]  |
| Xylarenone (11)                   | 192 | C <sub>11</sub> H <sub>12</sub> O <sub>3</sub> | <i>Xylariaceous</i> sp. PSU-A80               | <i>Garcinia atroviridis</i> (Leaves, Clusiaceae)               | Songkhla Province, Thailand                | [97]  |
|                                   |     |                                                | <i>Xylariales</i> sp. PSU-ES163               | <i>Halophila ovalis</i> (Seagrass leaves, Hydrocharitaceae)    | Trang, Thailand                            | [124] |
| (±)-Isosclerone (12)              | 178 | C <sub>10</sub> H <sub>10</sub> O <sub>3</sub> | <i>Guignardia laricina</i>                    | <i>Larix leptolepis</i> (Pinaceae)                             | Japan                                      | [147] |
|                                   |     |                                                | Unidentified freshwater fungus YMF 1.01029    | Split of decaying branches of an unidentified tree             | Near Lake Fuxian in Yunnan Province, China | [51]  |



|                                                                                                          |     |                                                |                                                    |                                                         |                                                          |       |
|----------------------------------------------------------------------------------------------------------|-----|------------------------------------------------|----------------------------------------------------|---------------------------------------------------------|----------------------------------------------------------|-------|
|                                                                                                          |     |                                                | <i>Botryosphaeria australis</i> ZJ12-1A            | <i>Sonneratia apetala</i> (Mangrove plant, Lythraceae)  | Xiamen Haicang mangrove Conservation Area, Fujian, China | [74]  |
| (3 <i>S</i> ,4 <i>R</i> )-4,8-Dihydroxy-3-methoxy-3,4-dihydro-1(2 <i>H</i> )-naphthalenone ( <b>13</b> ) | 208 | C <sub>11</sub> H <sub>12</sub> O <sub>4</sub> | <i>Phaeosphaeria</i> sp.                           | <i>Bambusa vulgaris</i> (Decaying bamboo stem, Poaceae) | Queen Sirikit Botanic Garden, Chiang Mai, Thailand       | [61]  |
| 3,8-Dihydroxy-3,4-dihydronaphthalen-1(2 <i>H</i> )-one (= Vermelone) ( <b>14</b> )                       | 178 | C <sub>10</sub> H <sub>10</sub> O <sub>3</sub> | <i>Ceratocystis minor</i> (Hedgc.) Hunt            | <i>Dendroctonus frontalis</i> (Insect, Scolytidae)      | Southern USA                                             | [118] |
|                                                                                                          |     |                                                | <i>Ceratocystis fimbriata coffea</i>               | <i>Coffea arabica</i> (Canker disease, Rubiaceae)       | China                                                    | [41]  |
|                                                                                                          |     |                                                | <i>Phaeosphaeria</i> sp.                           | <i>Bambusa vulgaris</i> (Decaying bamboo stem, Poaceae) | Queen Sirikit Botanic Garden, Chiang Mai, Thailand       | [61]  |
| (4 <i>S</i> )-4-Hydroxy-3,4-dihydronaphthalen-1(2 <i>H</i> )-one ( <b>15</b> )                           | 162 | C <sub>10</sub> H <sub>10</sub> O <sub>2</sub> | <i>Didymella glomerata</i> X223                    | <i>Saussurea laniceps</i> (Roots, Asteraceae)           | Tibet Kangbu hot, Yadong, Shigatse, Tibet, China         | [148] |
| (4 <i>S</i> )-4,6-Dihydroxy-3,4-dihydronaphthalen-1(2 <i>H</i> )-one ( <b>16</b> )                       | 178 | C <sub>10</sub> H <sub>10</sub> O <sub>3</sub> | <i>Didymella glomerata</i> X223                    | <i>Saussurea laniceps</i> (Roots, Asteraceae)           | Tibet Kangbu hot, Yadong, Shigatse, Tibet, China         | [148] |
| (+) -Scytalone (= 3,6,8-Trihydroxytetralone = rac-Scytalone) ( <b>17</b> )                               | 194 | C <sub>10</sub> H <sub>10</sub> O <sub>4</sub> | <i>Scytalidium</i> sp.                             | Cultured                                                | Japan                                                    | [57]  |
|                                                                                                          |     |                                                | <i>Verticillium dahlia</i> T9                      | Cultured                                                | USA                                                      | [149] |
|                                                                                                          |     |                                                | <i>Verticillium dahlia</i> brm-2 mutant            | Cultured                                                | USA                                                      | [119] |
|                                                                                                          |     |                                                | <i>Ceratocystis fimbriata coffea</i>               | <i>Coffea arabica</i> (Canker disease, Rubiaceae)       | China                                                    | [82]  |
|                                                                                                          |     |                                                | <i>Phaeoacremonium aleophilum</i> (Pal) PVFi69-257 | <i>Vitis vinifera</i> (Grapevine, Vitaceae)             | Italy                                                    | [42]  |

|                                                                                  |     |                                                |                                                     |                                                                    |                                                                            |       |
|----------------------------------------------------------------------------------|-----|------------------------------------------------|-----------------------------------------------------|--------------------------------------------------------------------|----------------------------------------------------------------------------|-------|
|                                                                                  |     |                                                | <i>Lachnellula</i> sp. A 32-89                      | <i>Polylepis sericea</i> (Bark, Rosaceae)                          | Laguna Negra, Venezuela                                                    | [35]  |
|                                                                                  |     |                                                | <i>Ceratocystis fimbriata</i> f. sp. <i>platani</i> | Cultured                                                           | Madonna del Piano, Ticino, Switzerland                                     | [39]  |
|                                                                                  |     |                                                | <i>Botrytis fabae</i> Bf-CO-05                      | <i>Vicia faba</i> (Bean, Fabaceae)                                 | Cordoba field, Institute for Sustainable Agriculture, CSIC, Cordoba, Spain | [44]  |
|                                                                                  |     |                                                | <i>Annulohypoxylon</i> sp.                          | <i>Rhizophora racemosa</i> (Mangrove plant fruits, Rhizophoraceae) | Cameroon                                                                   | [150] |
|                                                                                  |     |                                                | <i>Raffaelea quercivora</i> JCM 11526               | <i>Platypus quercivorus</i> (Ambrosia beetle, Curculionidae)       | Japan                                                                      | [43]  |
| (3R)-3,8-Dihydroxy-6-methoxy-tetralone (18)                                      | 208 | C <sub>11</sub> H <sub>12</sub> O <sub>4</sub> | <i>Phomopsis</i> sp. sh917                          | <i>Isodon eriocalyx</i> var. <i>laxiflora</i> (Stem, Lamiaceae)    | Kunming Botanical Garden, Kunming, China,                                  | [85]  |
| <i>cis</i> -4-Hydroxyscytalone (= 3 <i>S</i> ,4 <i>R</i> -Hydoxy-scytalone) (19) | 210 | C <sub>10</sub> H <sub>10</sub> O <sub>5</sub> | <i>Raffaelea quercivora</i> JCM 11526               | <i>Platypus quercivorus</i> (Ambrosia beetle, Curculionidae)       | Japan                                                                      | [43]  |
|                                                                                  | 210 | C <sub>10</sub> H <sub>10</sub> O <sub>5</sub> | <i>Mycosphaerella fijiensis</i> IMI 105378          | <i>Musa sapientum</i> (Musaceae)                                   | San Pedro Sula, Honduras                                                   | [40]  |
|                                                                                  |     |                                                | <i>Ceratocystis fimbriata coffea</i>                | <i>Coffea arabica</i> (Canker disease, Rubiaceae)                  | China                                                                      | [41]  |
|                                                                                  |     |                                                | <i>Ceratocystis fimbriata</i> f. sp. <i>platani</i> | Cultured                                                           | Madonna del Piano, Ticino, Switzerland                                     | [39]  |
|                                                                                  |     |                                                | <i>Caryospora callicarpa</i> YMF1.01026             | Submerged woody substrate, freshwater                              | Yunnan Province, China                                                     | [52]  |
|                                                                                  |     |                                                | <i>Daldinia eschscholzii</i>                        | <i>Mantis religiosa</i> (Mantis, Mantidae)                         | China                                                                      | [27]  |
|                                                                                  |     |                                                | <i>Alternaria</i> sp. A744                          | <i>Morinda officinalis</i> (Twigs, Rubiaceae)                      | Gaoyao city, Guangdong, China                                              | [82]  |

|                                                       |     |                                                |                                            |                                                                              |                                                         |
|-------------------------------------------------------|-----|------------------------------------------------|--------------------------------------------|------------------------------------------------------------------------------|---------------------------------------------------------|
| (±)-Scytalone (= 3,6,8-Trihydroxytetralone)<br>(20)   | 194 | C <sub>10</sub> H <sub>10</sub> O <sub>4</sub> | Xylariaceae sp. SCSGAF0086                 | Melitodes squamata (Gorgonian coral, South China Sea, Melithaeinae)<br>China | [134]                                                   |
| 6-Hydroxyisosclerone (21)                             | 194 | C <sub>10</sub> H <sub>10</sub> O <sub>4</sub> | Tubakia dryina (Sacc.) PV-6                | East of the Mississippi River                                                | USA [63]                                                |
|                                                       |     |                                                | Aureobasidium pullulans                    | Aloe vera (Leaves, Asphodelaceae)                                            | Marrakesh, Morocco [84]                                 |
|                                                       |     |                                                | Alternaria sp. A744                        | Morinda officinalis (Twigs, Rubiaceae)                                       | Gaoyao city, Guangdong, China [82]                      |
|                                                       |     |                                                | Paraphoma sp. HR-12-1                      | Desert                                                                       | Beijing, china [87]                                     |
| 4,6,8-Trihydroxy-3,4-dihydronaphthalen-1(2H)-one (22) | 194 | C <sub>10</sub> H <sub>10</sub> O <sub>4</sub> | Pyricularia oryzae Cav. (Ken 53-33)        | Rice blast                                                                   | Japan [129]                                             |
|                                                       |     |                                                | Sclerotinia sclerotiorum (LIB.) DE BARY.   | Cultured                                                                     | Japan [37]                                              |
|                                                       |     |                                                | Daldinia eschscholzii                      | Mantis religiosa (Mantis, Mantidae)                                          | China [27]                                              |
|                                                       |     |                                                | Ceratocystis minor (Hedgc.) Hunt           | Dendroctonus frontalis (Insect, Scolytidae)                                  | Southern USA [118]                                      |
|                                                       |     |                                                | Caryospora callicarpa YMF1.01026           | Submerged woody substrate, freshwater                                        | Yunnan Province, China [52]                             |
|                                                       |     |                                                | Phaeosphaeria sp.                          | Bambusa vulgaris (Decaying bamboo stem, Poaceae)                             | Queen Sirikit Botanic Garden, Chiang Mai, Thailand [61] |
|                                                       |     |                                                | Unidentified freshwater fungus YMF 1.01029 | Split of decaying branches of an unidentified tree                           | Near Lake Fuxian in Yunnan Province, China [51]         |
|                                                       |     |                                                | Thermomyces lanuginosus YMF 1.04048        | Soil                                                                         | Hotspring National Park, Yunnan, China [146]            |
| Didymelol A (23)                                      | 178 | C <sub>10</sub> H <sub>10</sub> O <sub>3</sub> | Didymella glomerata X223                   | Saussurea laniceps (Roots, Asteraceae)                                       | Tibet Kangbu hot, Yadong, Shigatse, Tibet, China [148]  |

|                                                                         |     |                                                |                                                     |                                                                    |                                                    |       |
|-------------------------------------------------------------------------|-----|------------------------------------------------|-----------------------------------------------------|--------------------------------------------------------------------|----------------------------------------------------|-------|
| (3S,4R)-3,4,6-Trihydroxy-3,4-dihydronaphthalen-1(2H)-one (24)           | 194 | C <sub>10</sub> H <sub>10</sub> O <sub>4</sub> | <i>Didymella glomerata</i> X223                     | <i>Saussurea laniceps</i> (Roots, Asteraceae)                      | Tibet Kangbu hot, Yadong, Shigatse, Tibet, China   | [148] |
| (R)-4,6,8-trihydroxy-3,4-dihydro-1(2H)-naphthalenone (25)               | 194 | C <sub>10</sub> H <sub>10</sub> O <sub>4</sub> | <i>Xylariaceae</i> sp. CR1546C                      | <i>Sticta fuliginosa</i> (Lichen, Lobariaceae)                     | Costa Rica                                         | [63]  |
|                                                                         |     |                                                | <i>Xylaria</i> sp. SYPF 8246                        | <i>Panax notoginseng</i> , roots (Araliaceae)                      | Wenshan, Yunnan, China                             | [151] |
| (3R,4R)-3,4-Dihydro-3,4,6,8-tetrahydroxy-1(2H)-naphthalenone (26)       | 210 | C <sub>10</sub> H <sub>10</sub> O <sub>5</sub> | <i>Xylariales</i> sp. PSU-ES163                     | <i>Halophila ovalis</i> (Seagrass leaves, Hydrocharitaceae)        | Trang, Thailand                                    | [124] |
|                                                                         |     |                                                | <i>Thermomyces lanuginosus</i> YMF 1.04048          | Soil                                                               | Hotspring National Park, Yunnan, China             | [146] |
| 3,4,8-Trihydroxy-6-(hydroxymethyl)-3,4-dihydronaphthalen-1(2H)-one (27) | 224 | C <sub>11</sub> H <sub>12</sub> O <sub>5</sub> | <i>Daldinia eschscholzii</i>                        | <i>Mantis religiosa</i> (Mantis, Mantidae)                         | China                                              | [27]  |
| 3,4,6,8-Tetrahydroxy-3,4-dihydronaphthalen-1(2H)-one (28)               | 210 | C <sub>10</sub> H <sub>10</sub> O <sub>5</sub> | <i>Sclerotinia sclerotiorum</i> (LIB.) DE BARY.     | Cultured                                                           | Japan                                              | [37]  |
|                                                                         |     |                                                | <i>Ceratocystis minor</i> (Hedgc.) Hunt             | <i>Dendroctonus frontalis</i> (Insect, Scolytidae)                 | Southern USA                                       | [118] |
|                                                                         |     |                                                | <i>Ceratocystis fimbriata</i> f. sp. <i>platani</i> | Cultured                                                           | Madonna del Piano, Ticino, Switzerland             | [39]  |
|                                                                         |     |                                                | <i>Phaeosphaeria</i> sp.                            | <i>Bambusa vulgaris</i> (Decaying bamboo stem, Poaceae)            | Queen Sirikit Botanic Garden, Chiang Mai, Thailand | [61]  |
|                                                                         |     |                                                | <i>Annulohypoxylon</i> sp.                          | <i>Rhizophora racemosa</i> (Mangrove plant fruits, Rhizophoraceae) | Cameroon                                           | [150] |
| Phomopsiketone C (29)                                                   | 224 | C <sub>11</sub> H <sub>12</sub> O <sub>5</sub> | <i>Phomopsis</i> sp. sh917                          | <i>Isodon eriocalyx</i> var. <i>laxiflora</i> (Stem, Lamiaceae)    | Kunming Botanical Garden, Kunming, China,          | [85]  |
| (3R,4R)-3,4,8-trihydroxy-6-methoxy-3,4-dihydro-1(2H)-naphthalenone (30) | 224 | C <sub>11</sub> H <sub>12</sub> O <sub>5</sub> | <i>Pleosporales</i> sp. F46                         | <i>Mahonia fortune</i> (Pedicel, Berberidaceae)                    | Qingdao, China.                                    | [145] |

|                                                                              |     |                                                |                                                  |                                                                |                                                                                          |       |
|------------------------------------------------------------------------------|-----|------------------------------------------------|--------------------------------------------------|----------------------------------------------------------------|------------------------------------------------------------------------------------------|-------|
| (3S,4S)-3,4,8-Trihydroxy-6-methoxy-3,4-dihydro-1(2H)-naphthalenone (31)      | 224 | C <sub>11</sub> H <sub>12</sub> O <sub>5</sub> | <i>Phaeosphaeria</i> sp.                         | <i>Bambusa vulgaris</i> (Decaying bamboo stem, Poaceae)        | Queen Sirikit Botanic Garden, Chiang Mai, Thailand                                       | [61]  |
|                                                                              |     |                                                | <i>Neofusicoccum austral</i> BL24 (haplotype H1) | <i>Phoenixian juniper</i> (Symptomatic branch, Cupressaceae)   | Natural area on Caprera Island, Italy                                                    | [45]  |
| (3S,4S)-4-Hydroxyscytalone (32)                                              | 210 | C <sub>10</sub> H <sub>10</sub> O <sub>5</sub> | <i>Penicillium</i> sp. KMM 4672                  | <i>Padina</i> sp. (Brown alga, Dictyotaceae)                   | Van Phong Bay, South China Sea, Vietnam                                                  | [113] |
| 2,4,6,8-Tetrahydroxy-3,4-dihydronaphthalen-1(2H)-one (33)                    | 210 | C <sub>10</sub> H <sub>10</sub> O <sub>5</sub> | <i>Sclerotinia sclerotiorum</i> (LIB.) DE BARY   | Cultured                                                       | Japan                                                                                    | [37]  |
| Teratosphaerone B (34)                                                       | 222 | C <sub>12</sub> H <sub>14</sub> O <sub>4</sub> | <i>Teratosphaeria</i> sp. FL2137                 | <i>Pinus clausa</i> (Leaves, Pinaceae)                         | The ground of a pine dominated scrub forest, Archbold Biological Station in Florida, USA | [152] |
| (3S,4R)-(+)-3,4,5-Trihydroxy-1-tetralone (= 4-Hydroxy-6-deoxyscytalone) (35) | 194 | C <sub>10</sub> H <sub>10</sub> O <sub>4</sub> | <i>Xylariaceae</i> sp. SCSGAF0086                | <i>Melitodes squamata</i> (Gorgonian coral, Melithaeinae)      | South China Sea, China                                                                   | [134] |
| (4S)-5-Hydroxy-4-methoxy- $\alpha$ -tetralone (36)                           | 192 | C <sub>11</sub> H <sub>12</sub> O <sub>3</sub> | <i>Cytospora eugeniae</i> BCC42696               | <i>Arenga pinnata</i> (Petiole, Arecaceae)                     | Oil palm garden, Trang, Thailand                                                         | [144] |
| (4R)-(-)-5-O-Methylsclerone (37)                                             | 192 | C <sub>11</sub> H <sub>12</sub> O <sub>3</sub> | <i>Xylariaceae</i> sp. SCSGAF0086                | <i>Melitodes squamata</i> (Gorgonian coral, Melithaeinae)      | South China Sea, China                                                                   | [134] |
| (R)-4,5-Dihydroxy-3,4-dihydronaphthalen-1(2H)-one (38)                       | 178 | C <sub>10</sub> H <sub>10</sub> O <sub>3</sub> | <i>Phialocephala fortinii</i>                    | <i>Pamelia</i> sp. (Lichen, Parmeliaceae)                      | Mount Qingliang, Zhejiang, China                                                         | [137] |
| (4R)-(-)-5-Hydroxy-4-methoxy-1-tetralone (39)                                | 192 | C <sub>11</sub> H <sub>12</sub> O <sub>3</sub> | <i>Xylariaceae</i> sp. SCSGAF0086                | <i>Melitodes squamata</i> (Gorgonian coral, Melithaeinae)      | South China Sea, China                                                                   | [134] |
| (3S*,4S*)-3,4,5-trihydroxy-1-tetralone (40)                                  | 194 | C <sub>10</sub> H <sub>10</sub> O <sub>4</sub> | <i>Neofusicoccum parvum</i> B19                  | <i>Vitis vinifera</i> (Declining vines of grapevine, Vitaceae) | Inzolia, Sicily                                                                          | [46]  |
|                                                                              |     |                                                | <i>Daldinia eschscholtzii</i>                    | <i>Paphiopedilum exul</i> (Orchid roots, Orchidaceae)          | Chiang Mai, Thailand                                                                     | [21]  |

|                                                                                      |     |                                                |                                                                   |                                                                                 |                                                                            |       |
|--------------------------------------------------------------------------------------|-----|------------------------------------------------|-------------------------------------------------------------------|---------------------------------------------------------------------------------|----------------------------------------------------------------------------|-------|
| 3,4-Dihydro-3,4,5-trihydroxy-1(2H)-naphthalenone (41)                                | 194 | C <sub>10</sub> H <sub>10</sub> O <sub>4</sub> | <i>Hypoxylon mammarium</i>                                        | <i>Populus tremula</i> (Canker margin of an infected quaking aspen, Salicaceae) | France                                                                     | [121] |
| Botrytone (42)                                                                       | 194 | C <sub>10</sub> H <sub>10</sub> O <sub>4</sub> | <i>Botrytis fabae</i> Bf-CO-05                                    | <i>Vicia faba</i> (Bean, Fabaceae)                                              | Cordoba field, Institute for Sustainable Agriculture, CSIC, Cordoba, Spain | [44]  |
| (3S)-3,8-Dihydroxy-6,7-dimethyl- $\alpha$ -tetralone (43)                            | 206 | C <sub>12</sub> H <sub>14</sub> O <sub>3</sub> | <i>Daldinia eschscholtzii</i> PSUSTD57                            | <i>Bruguiera gymnorrhiza</i> (Mangrove plant leaves, Rhizophoraceae)            | Suratthani, Thailand                                                       | [64]  |
|                                                                                      |     |                                                | <i>Cladosporium</i> sp. JJM22                                     | <i>Ceriops tagal</i> (Rhizophoraceae)                                           | South China Sea, Dongzhaigang, Hainan, China                               | [65]  |
|                                                                                      |     |                                                | <i>Cladosporium</i> sp. JJM22                                     | <i>Ceriops tagal</i> (Mangrove plant, Rhizophoraceae)                           | Dongzhaigang, Hainan, China                                                | [65]  |
| (-)-cis-(3R*,4S*)-3,4,8-Trihydroxy-6,7-dimethyl-3,4-dihydro-1(2H)-naphthalenone (44) | 222 | C <sub>12</sub> H <sub>14</sub> O <sub>4</sub> | <i>Nodulisporium</i> sp.                                          | <i>Antidesma ghaesembilla</i> (Fresh twigs, Phyllanthaceae)                     | Chiang Mai, Thailand                                                       | [66]  |
| Nodulone C (45)                                                                      | 222 | C <sub>12</sub> H <sub>14</sub> O <sub>4</sub> | <i>Daldinia eschscholtzii</i>                                     | <i>Paphiopedilum exul</i> (Orchid roots, Orchidaceae)                           | Chiang Mai, Thailand                                                       | [21]  |
| Asparvenone (46)                                                                     | 224 | C <sub>11</sub> H <sub>12</sub> O <sub>5</sub> | <i>Aspergillus parvulus</i>                                       | Cultured                                                                        | USA                                                                        | [153] |
|                                                                                      |     |                                                | <i>Aspergillus parvulus</i> FB6036                                | Cultured                                                                        | Japan                                                                      | [102] |
| 6-O-Methylasparvenone (47)                                                           | 238 | C <sub>12</sub> H <sub>14</sub> O <sub>5</sub> | <i>Aspergillus parvulus</i>                                       | Cultured                                                                        | USA                                                                        | [153] |
|                                                                                      |     |                                                | <i>Lachnum papyraceum</i> A48-88 (Karst.) Karst                   | Cultured                                                                        | Germany                                                                    | [44]  |
|                                                                                      |     |                                                | <i>Aspergillus parvulus</i> FB6036                                | Cultured                                                                        | Japan                                                                      | [102] |
|                                                                                      |     |                                                | <i>Neofusicoccum austral</i> SYSU-SKS024                          | <i>Kandelia candel</i> (Mangrove plant branches, Rhizophoraceae)                | Shankou, Guangxi, China                                                    | [107] |
| 3,4-Dihydro-4,8-dihydroxy-6-methoxy-7-methyl-1(2H)-naphthalenone (48)                | 222 | C <sub>12</sub> H <sub>14</sub> O <sub>4</sub> | <i>Lachnum papyraceum</i> A48-88 (Karst.) Karst (Hyaloscyphaceae) | Cultured                                                                        | Germany                                                                    | [44]  |

|                                                                                                           |     |                                                |                                                        |                                                                  |                                                          |       |
|-----------------------------------------------------------------------------------------------------------|-----|------------------------------------------------|--------------------------------------------------------|------------------------------------------------------------------|----------------------------------------------------------|-------|
| (3 <i>R</i> *,4 <i>S</i> *)-3,4-Dihydroxy-7-methyl-3,4-dihydro-1(2 <i>H</i> )-naphthalenone ( <b>49</b> ) | 192 | C <sub>11</sub> H <sub>12</sub> O <sub>3</sub> | <i>Acremonium roseogriseum</i> (S. B. Saksena) W. Gams | <i>Cladostephus spongius</i> (Brown alga)                        | Mediterranean Sea, Spanish coast, Moraira                | [98]  |
| (3 <i>S</i> *,4 <i>S</i> *)-3,4-Dihydroxy-7-methyl-3,4-dihydro-1(2 <i>H</i> )-naphthalenone ( <b>50</b> ) | 192 | C <sub>11</sub> H <sub>12</sub> O <sub>3</sub> | <i>Acremonium roseogriseum</i> (S. B. Saksena) W. Gams | <i>Cladostephus spongius</i> (Brown alga)                        | Mediterranean Sea, Spanish coast, Moraira                | [98]  |
| Corynenone A ( <b>51</b> )                                                                                | 240 | C <sub>11</sub> H <sub>12</sub> O <sub>6</sub> | <i>Corynespora cassiicola</i> XS-2009017               | Unidentified sponge (XS-2009001)                                 | Xisha Islands coral reef, South China Sea, China         | [114] |
| Corynenone B ( <b>52</b> )                                                                                | 240 | C <sub>11</sub> H <sub>12</sub> O <sub>6</sub> | <i>Corynespora cassiicola</i> XS-2009017               | Unidentified sponge (XS-2009001)                                 | Xisha Islands coral reef, South China Sea, China         | [114] |
| Botryosphaerone D ( <b>53</b> )                                                                           | 252 | C <sub>13</sub> H <sub>16</sub> O <sub>5</sub> | <i>Botryosphaeria australis</i> ZJ12-1A                | <i>Sonneratia apetala</i> (Mangrove plant, Lythraceae)           | Xiamen Haicang mangrove Conservation Area, Fujian, China | [74]  |
|                                                                                                           |     |                                                | <i>Neofusicoccum austral</i> BL24 (haplotype H1)       | <i>Phoenicean juniper</i> (Symptomatic branch, Cupressaceae)     | Vatural area on Caprera Island, Italy                    | [45]  |
|                                                                                                           |     |                                                | <i>Neofusicoccum austral</i> SYSU-SKS024               | <i>Kandelia candel</i> (Mangrove plant branches, Rhizophoraceae) | Shankou, Guangxi, China                                  | [107] |
| (3 <i>R</i> ,4 <i>R</i> )-3-Methoxyl-botryosphaerone D ( <b>54</b> )                                      | 266 | C <sub>14</sub> H <sub>18</sub> O <sub>5</sub> | <i>Neofusicoccum austral</i> SYSU-SKS024               | <i>Kandelia candel</i> (Mangrove plant branches, Rhizophoraceae) | Shankou, Guangxi, China                                  | [107] |
| Botryosphaerone E ( <b>55</b> )                                                                           | 266 | C <sub>14</sub> H <sub>18</sub> O <sub>5</sub> | <i>Pyrenochaetopsis</i> sp. MSX63693                   | Cultured                                                         | USA                                                      | [86]  |
| 4,8-Dihydroxy-7-(2-hydroxy-ethyl)-6-methoxy-3,4-dihydro-2 <i>H</i> -naphthalen-1-one ( <b>56</b> )        | 252 | C <sub>13</sub> H <sub>16</sub> O <sub>5</sub> | <i>Mycelia sterilia</i>                                | Sponge                                                           | China                                                    | [154] |
| (-)-4,8-Dihydroxy-7-(2-hydroxy-ethyl)-6-methoxy-3,4-dihydro-2 <i>H</i> -naphthalen-1-one ( <b>57</b> )    | 252 | C <sub>13</sub> H <sub>16</sub> O <sub>5</sub> | <i>Leptosphaerulina chartarum</i> 3608                 | Crinoid (Marine animal, Crinoidea)                               | Xuwen, Zhanjiang City, Guangdong, China                  | [91]  |
| (+)-10-Norparvulenone ( <b>58</b> )                                                                       | 236 | C <sub>13</sub> H <sub>16</sub> O <sub>4</sub> | <i>Leptosphaerulina chartarum</i> 3608                 | Crinoid (Marine animal, Crinoidea)                               | Xuwen, Zhanjiang City,                                   | [91]  |

|                                                                                         |     |                                                |                                    |                                                               |                                                             |       |
|-----------------------------------------------------------------------------------------|-----|------------------------------------------------|------------------------------------|---------------------------------------------------------------|-------------------------------------------------------------|-------|
|                                                                                         |     |                                                |                                    |                                                               | Guangdong, China                                            |       |
| 4,6,8-Trihydroxy-5-methyl-3,4-dihydronaphthalen-1(2H)-one (59)                          | 208 | C <sub>11</sub> H <sub>12</sub> O <sub>4</sub> | <i>Paraphoma</i> sp. HR-12-1       | Desert                                                        | Beijing, china                                              | [87]  |
| 3S*,4S*-7-Ethyl-4,8-dihydroxy-3,6-dimethoxy-3,4-dihydronaphthalen-1(2H)-one (60)        | 266 | C <sub>14</sub> H <sub>18</sub> O <sub>5</sub> | <i>Delitschia</i> sp. JF16003      | Submerged wood                                                | Ariège, Rimont, France                                      | [155] |
| (3R*,4S*)-7-Ethyl-3,4,6,8-tetrahydroxy-3,4-dihydronaphthalen-1(2H)-one (61)             | 238 | C <sub>12</sub> H <sub>14</sub> O <sub>5</sub> | <i>Delitschia corticola</i>        | Submerged wood                                                | Freshwater habitat, Yunnan, China                           | [67]  |
| (-)-trans-(3R,4R)-3,4,8-Trihydroxy-6,7-dimethyl-3,4-dihydronaphthalen-1(2H)-one (62)    | 222 | C <sub>12</sub> H <sub>14</sub> O <sub>4</sub> | <i>Cladosporium</i> sp. JJM22      | <i>Ceriops tagal</i> (Mangrove plant, Rhizophoraceae)         | Dongzhaigang, Hainan, China                                 | [65]  |
|                                                                                         |     |                                                | <i>Cladosporium</i> sp. JJM22      | <i>Ceriops tagal</i> (Rhizophoraceae)                         | South China Sea, Dongzhaigang, Hainan, China                | [65]  |
| Nodulone (63)                                                                           | 236 | C <sub>12</sub> H <sub>12</sub> O <sub>5</sub> | <i>Nodulisporium</i> sp. A4        | <i>Aquilaria sinensis</i> (Stems, Thymelaeaceae)              | Xinyi, Guangdong Province, China                            | [156] |
|                                                                                         |     |                                                | <i>Daldinia eschscholtzii</i>      | <i>Mantis religiosa</i> (Mantis, Mantidae)                    | China                                                       | [27]  |
|                                                                                         |     |                                                | <i>Daldinia eschscholtzii</i>      | <i>Paphiopedilum exul</i> (Orchid roots, Orchidaceae)         | Chiang Mai, Thailand                                        | [21]  |
| (-)-cis-(7R*,8S*)-4,7,8-Trihydroxy-3,6,7,8-tetrahydronaphtho[2,3-c]furan-5(1H)-one (64) | 236 | C <sub>12</sub> H <sub>12</sub> O <sub>5</sub> | <i>Nodulisporium</i> sp.           | <i>Antidesma ghaesembilla</i> , (Fresh twigs, Phyllanthaceae) | Chiang Mai, Thailand                                        | [66]  |
| Nodulone B (65)                                                                         | 220 | C <sub>12</sub> H <sub>12</sub> O <sub>4</sub> | <i>Daldinia eschscholtzii</i>      | <i>Paphiopedilum exul</i> (Orchid roots, Orchidaceae)         | Chiang Mai, Thailand                                        | [21]  |
| 3,4-Dihydro-3-(2(ξ)-hydroxypropyl)-3(ξ),6,8-trihydroxy-1(2H)-naphthalenone (66)         | 252 | C <sub>13</sub> H <sub>16</sub> O <sub>5</sub> | <i>Botryosphaeria</i> sp. BCC 8200 | <i>Musa</i> sp. (Musaceae)                                    | Doi Suthep-Pui National Park, Chiang Mai Province, Thailand | [68]  |
| 3,4-Dihydro-3-(2-oxo-propyl)-3(ξ),6,8-trihydroxy-1(2H)-naphthalenone (67)               | 250 | C <sub>13</sub> H <sub>14</sub> O <sub>5</sub> | <i>Botryosphaeria</i> sp. BCC 8200 | <i>Musa</i> sp. (Musaceae)                                    | Doi Suthep-Pui National Park, Chiang Mai                    | [68]  |



|                                                                                                              |     |                                                |                                    |                                                         |                                                             |                       |  |
|--------------------------------------------------------------------------------------------------------------|-----|------------------------------------------------|------------------------------------|---------------------------------------------------------|-------------------------------------------------------------|-----------------------|--|
|                                                                                                              |     |                                                |                                    |                                                         |                                                             | Province,<br>Thailand |  |
| 3,6,8-Trihydroxy-3-[3,5-dimethyl-2-oxo-3( <i>E</i> )-heptenyl]-2,3-dihydronaphthalen-1(4 <i>H</i> )-one (68) | 332 | C <sub>19</sub> H <sub>24</sub> O <sub>5</sub> | <i>Keissleriella</i> sp. Y4108     | Marine sediment                                         | Yellow Sea, Sheyang port, China                             | [69]                  |  |
| 3,4-Dihydro-3-(4(ξ)-hydroxy-2-oxo-pentyl)-3(ξ),6,8-trihydroxy-1(2 <i>H</i> )-naphthalenone (69)              | 294 | C <sub>15</sub> H <sub>18</sub> O <sub>6</sub> | <i>Botryosphaeria</i> sp. BCC 8200 | <i>Musa</i> sp. (Musaceae)                              | Doi Suthep-Pui National Park, Chiang Mai Province, Thailand | [68]                  |  |
| Scytalol A (70)                                                                                              | 294 | C <sub>15</sub> H <sub>18</sub> O <sub>6</sub> | <i>Scytalidium</i> sp. 36-93       | Infected body of <i>Basidiomycete</i> growing on wood   | Germany                                                     | [105]                 |  |
| Scytalol B (71)                                                                                              | 308 | C <sub>16</sub> H <sub>20</sub> O <sub>6</sub> | <i>Scytalidium</i> sp. 36-93       | Infected body of <i>Basidiomycete</i> growing on wood   | Germany                                                     | [105]                 |  |
| Scytalol C (72)                                                                                              | 320 | C <sub>17</sub> H <sub>20</sub> O <sub>6</sub> | <i>Scytalidium</i> sp. 36-93       | Infected body of <i>Basidiomycete</i> growing on wood   | Germany                                                     | [105]                 |  |
|                                                                                                              |     |                                                | <i>Pleosporales</i> strain 222     | Driftwood                                               | Coast of the Greifswalder Bodden, Baltic Sea, Germany       | [70]                  |  |
|                                                                                                              |     |                                                | <i>Biatriospora</i> sp. 8331C      | <i>Pseudosyphellaria</i> sp. (Lichen, Lobariaceae)      | Changbai Mountain, Jilin, China                             | [157]                 |  |
| Scytalol D (73)                                                                                              | 264 | C <sub>14</sub> H <sub>16</sub> O <sub>5</sub> | <i>Scytalidium</i> sp. 36-93       | Infected body of a <i>Basidiomycete</i> growing on wood | Germany                                                     | [105]                 |  |
|                                                                                                              |     |                                                | <i>Biatriospora</i> sp. 8331C      | <i>Pseudosyphellaria</i> sp. (Lichen, Lobariaceae)      | Changbai Mountain, Jilin, China                             | [157]                 |  |
| Balticol A (74)                                                                                              | 264 | C <sub>14</sub> H <sub>16</sub> O <sub>5</sub> | <i>Pleosporales</i> strain 222,    | Driftwood                                               | Coast of the Greifswalder Bodden, Baltic Sea, Germany       | [70]                  |  |

|                                   |     |                                                |                                  |                                                    |                                                                                                |
|-----------------------------------|-----|------------------------------------------------|----------------------------------|----------------------------------------------------|------------------------------------------------------------------------------------------------|
|                                   |     |                                                | <i>Biatriospora</i> sp. 8331C    | <i>Pseudosyphellaria</i> sp. (Lichen, Lobariaceae) | Changbai Mountain, Jilin, China [157]                                                          |
|                                   |     |                                                | <i>Pleosporales</i> sp. F46      | <i>Mahonia fortune</i> (Pedicel, Berberidaceae)    | Qingdao, China [145]                                                                           |
| Balticol B (75)                   | 238 | C <sub>12</sub> H <sub>14</sub> O <sub>5</sub> | <i>Pleosporales</i> strain 222   | Driftwood                                          | Coast of the Greifswalder Bodden, Baltic Sea, Germany [70]                                     |
|                                   |     |                                                | <i>Pleosporales</i> sp. F46      | <i>Mahonia fortune</i> (Pedicel, Berberidaceae)    | Qingdao, China [145]                                                                           |
| Iso-Balticol B-4,9-acetonide (76) | 278 | C <sub>15</sub> H <sub>18</sub> O <sub>5</sub> | <i>Teratosphaeria</i> sp. FL2137 | <i>Pinus clausa</i> (Leaves, Pinaceae)             | The ground of a pine dominated scrub forest, Archbold Biological Station in Florida, USA [152] |
| Iso-Balticol B (77)               | 238 | C <sub>12</sub> H <sub>14</sub> O <sub>5</sub> | <i>Teratosphaeria</i> sp. FL2137 | <i>Pinus clausa</i> (Leaves, Pinaceae)             | The ground of a pine-dominated scrub forest, Archbold Biological Station in Florida, USA [152] |
| Balticol C (78)                   | 254 | C <sub>12</sub> H <sub>14</sub> O <sub>6</sub> | <i>Pleosporales</i> strain 222   | Driftwood                                          | Coast of the Greifswalder Bodden, Baltic Sea, Germany [70]                                     |
| (+)-Balticol C (79)               | 254 | C <sub>12</sub> H <sub>14</sub> O <sub>6</sub> | <i>Teratosphaeria</i> sp. FL2137 | <i>Pinus clausa</i> (Leaves, Pinaceae)             | The ground of a pine-dominated scrub forest, Archbold Biological [152]                         |

|                                       |     |                                                |                                           |                                                     |  | Station in<br>Florida, USA                                         |
|---------------------------------------|-----|------------------------------------------------|-------------------------------------------|-----------------------------------------------------|--|--------------------------------------------------------------------|
| Balticol D (80)                       | 280 | C <sub>14</sub> H <sub>16</sub> O <sub>6</sub> | <i>Pleosporales</i> strain 222            | Driftwood                                           |  | Coast of the Greifswalder Bodden, Baltic Sea, Germany [70]         |
| Balticol E (81)                       | 282 | C <sub>14</sub> H <sub>18</sub> O <sub>6</sub> | <i>Pleosporales</i> strain 222            | Driftwood                                           |  | Coast of the Greifswalder Bodden, Baltic Sea, Germany [70]         |
|                                       |     |                                                | <i>Biatrispora</i> sp. 8331C              | <i>Pseudosyphellaria</i> sp. (Lichen, Lobariaceae)  |  | Changbai Mountain, Jilin, China [157]                              |
| Balticol F (82)                       | 294 | C <sub>15</sub> H <sub>18</sub> O <sub>6</sub> | <i>Pleosporales</i> strain 222            | Driftwood                                           |  | Coast of the Greifswalder Bodden, Baltic Sea, Germany [70]         |
|                                       |     |                                                | <i>Biatrispora</i> sp. 8331C              | <i>Pseudosyphellaria</i> sp. (Lichen, Lobariaceae)  |  | Changbai Mountain, Jilin, China [157]                              |
| Fusaranthraquinone (83)               | 324 | C <sub>16</sub> H <sub>20</sub> O <sub>7</sub> | <i>Fusarium</i> spp. PSU-F14 and PSU-F135 | <i>Annella</i> sp. (Gorgonian Sea fan, Gorgoniidae) |  | Koh Hin Ran Pet, Suratthani, Thailand [72]                         |
| 9α-Hydroxydihydrodesoxybostrycin (84) | 324 | C <sub>16</sub> H <sub>20</sub> O <sub>7</sub> | PSU-N24                                   | <i>Garcinia nigrolineata</i> (Branch, Clusiaceae)   |  | Ton Nga Chang wildlife sanctuary, Songkhla, southern Thailand [71] |
| 9α-Hydroxyhalorosellinia A (85)       | 340 | C <sub>16</sub> H <sub>20</sub> O <sub>8</sub> | PSU-N24                                   | <i>Garcinia nigrolineata</i> (Branch, Clusiaceae)   |  | Ton Nga Chang wildlife sanctuary, Songkhla, [71]                   |

|                                         |     |                                                |                                           |                                                                 |                                                               |       |
|-----------------------------------------|-----|------------------------------------------------|-------------------------------------------|-----------------------------------------------------------------|---------------------------------------------------------------|-------|
|                                         |     |                                                |                                           |                                                                 | southern Thailand                                             |       |
|                                         |     |                                                | <i>Fusarium</i> spp. PSU-F14 and PSU-F135 | <i>Annella</i> sp. (Gorgonian Sea fan, Gorgoniidae)             | Koh Hin Ran Pet, Suratthani, Thailand                         | [72]  |
| Fusarnaphthoquinone A (86)              | 310 | C <sub>15</sub> H <sub>18</sub> O <sub>7</sub> | <i>Fusarium</i> spp. PSU-F14 and PSU-F135 | <i>Annella</i> sp. (Gorgonian Sea fan, Gorgoniidae)             | Koh Hin Ran Pet, Suratthani, Thailand                         | [72]  |
| Fusarnaphthoquinone B (87)              | 276 | C <sub>15</sub> H <sub>16</sub> O <sub>5</sub> | <i>Fusarium</i> spp. PSU-F14 and PSU-F135 | <i>Annella</i> sp. (Gorgonian Sea fan, Gorgoniidae)             | Koh Hin Ran Pet, Suratthani, Thailand                         | [72]  |
|                                         |     |                                                | <i>Fusarium</i> spp. PSU-F14 and PSU-F135 | <i>Annella</i> sp. (Gorgonian Sea fan, Gorgoniidae)             | Koh Hin Ran Pet, Suratthani, Thailand                         | [72]  |
| 3-Demethoxyl-fusarnaphthoquinone B (88) | 246 | C <sub>14</sub> H <sub>14</sub> O <sub>4</sub> | <i>Fusarium</i> sp. HP-2                  | <i>Aquilaria malaccensis</i> (Agarwood, Thymelaeaceae)          | Ledong County, Hainan, China                                  | [108] |
| 9S-Hydroxydihydrodesoxybostrycin (89)   | 324 | C <sub>16</sub> H <sub>20</sub> O <sub>7</sub> | PSU-N24                                   | <i>Garcinia nigrolineata</i> (Branch, Clusiaceae)               | Ton Nga Chang wildlife sanctuary, Songkhla, southern Thailand | [71]  |
| Perenniporide A (90)                    | 334 | C <sub>17</sub> H <sub>18</sub> O <sub>7</sub> | <i>Perenniporia</i> sp.                   | <i>Euops chinensis</i> (Leaf-rolling weevil larva, Attelabidae) | Mingyue Mountain, Jiangxi, China                              | [73]  |
|                                         |     |                                                | <i>Neofusicoccum parvum</i> B19           | <i>Vitis vinifera</i> (Declining vines of grapevine, Vitaceae)  | Inzolia, Sicily                                               | [46]  |
| Perenniporide B (91)                    | 366 | C <sub>18</sub> H <sub>22</sub> O <sub>8</sub> | <i>Perenniporia</i> sp.                   | <i>Euops chinensis</i> (Leaf-rolling weevil larva, Attelabidae) | Mingyue Mountain, Jiangxi, China                              | [73]  |
| Perenniporide C (92)                    | 366 | C <sub>18</sub> H <sub>22</sub> O <sub>8</sub> | <i>Perenniporia</i> sp.                   | <i>Euops chinensis</i> (Leaf-rolling weevil larva, Attelabidae) | Mingyue Mountain, Jiangxi, China                              | [73]  |

|                                                             |     |                                                |                                          |                                                                  |                                                                        |       |
|-------------------------------------------------------------|-----|------------------------------------------------|------------------------------------------|------------------------------------------------------------------|------------------------------------------------------------------------|-------|
| Perenniporide D (93)                                        | 352 | C <sub>17</sub> H <sub>20</sub> O <sub>8</sub> | <i>Perenniporia</i> sp.                  | <i>Euops chinensis</i> (Leaf-rolling weevil larva, Attelabidae)  | Mingyue Mountain, Jiangxi, China                                       | [73]  |
|                                                             |     |                                                | <i>Neofusicoccum parvum</i> B19          | <i>Vitis vinifera</i> (Declining vines of grapevine, Vitaceae)   | Inzolia, Sicily                                                        | [46]  |
| Botryosphaerone A (94)                                      | 268 | C <sub>13</sub> H <sub>16</sub> O <sub>6</sub> | <i>Botryosphaeria australis</i> ZJ12-1A  | <i>Sonneratia apetala</i> (Mangrove plant, Lythraceae)           | Xiamen Haicang mangrove Conservation Area, Fujian, China               | [74]  |
| Botryosphaerone B (95)                                      | 268 | C <sub>13</sub> H <sub>16</sub> O <sub>6</sub> | <i>Botryosphaeria australis</i> ZJ12-1A  | <i>Sonneratia apetala</i> (Mangrove plant, Lythraceae)           | Xiamen Haicang mangrove Conservation Area, Fujian, China               | [74]  |
|                                                             |     |                                                | <i>Neofusicoccum austral</i> SYSU-SKS024 | <i>Kandelia candel</i> (Mangrove plant branches, Rhizophoraceae) | Shankou, Guangxi, China                                                | [107] |
| Botryosphaerone C (96)                                      | 282 | C <sub>14</sub> H <sub>18</sub> O <sub>6</sub> | <i>Botryosphaeria australis</i> ZJ12-1A  | <i>Sonneratia apetala</i> (Mangrove plant, Lythraceae)           | Xiamen Haicang mangrove Conservation Area, Fujian, China               | [74]  |
| (2S,3S,4S)-8-Dehydroxy-8-methoxyl-dihydronaphthalenone (97) | 306 | C <sub>16</sub> H <sub>18</sub> O <sub>6</sub> | <i>Fusarium</i> sp. HP-2                 | <i>Aquilaria malaccensis</i> (Agarwood, Thymelaeaceae)           | Ledong County, Hainan, China                                           | [108] |
| Dihydronaphthalenone (2S,3S,4S) (98)                        | 292 | C <sub>15</sub> H <sub>16</sub> O <sub>6</sub> | <i>Fusarium</i> sp. BCC14842             | <i>Bambusa vulgaris</i> (Bamboo leaf, Poaceae)                   | Bamboo forest at Nam Nao National Park, Phetchabun Province, Thailand. | [75]  |
|                                                             |     |                                                | <i>Fusarium</i> sp. HP-2                 | <i>Aquilaria malaccensis</i> (Agarwood, Thymelaeaceae)           | Ledong County, Hainan, China                                           | [108] |
|                                                             |     |                                                | <i>Fusarium solani</i> B-18              | Inner tissue of the unidentified forest litters                  | Merapi Mt. area, Sleman,                                               | [158] |

|                                                                                                       |     |                                                |                                            |                                                    |                                                                                                            |       |
|-------------------------------------------------------------------------------------------------------|-----|------------------------------------------------|--------------------------------------------|----------------------------------------------------|------------------------------------------------------------------------------------------------------------|-------|
|                                                                                                       |     |                                                |                                            |                                                    | Yogyakarta,<br>Indonesia                                                                                   |       |
| Diastereomer-Dihydronaphthalenone B<br>(2R,3S,4R) ( <b>99</b> )                                       | 292 | C <sub>15</sub> H <sub>16</sub> O <sub>6</sub> | <i>Fusarium</i> sp. BCC14842               | <i>Bambusa vulgaris</i> (Bamboo leaf,<br>Poaceae)  | Bamboo forest at<br>Nam Nao<br>National Park,<br>Phetchabun<br>Province,<br>Thailand.                      | [75]  |
|                                                                                                       |     |                                                | <i>Fusarium solani</i> B-18                | Inner tissue of the unidentified forest<br>litters | Merapi Mt. area,<br>Sleman,<br>Yogyakarta,<br>Indonesia                                                    | [158] |
|                                                                                                       |     |                                                | <i>Fusarium solani</i> H918                | Mangrove sediments                                 | Zhangjiangkou<br>Mangrove<br>National Nature<br>Reserve, Fujian,<br>China                                  | [159] |
| (3aS,9R,9aS)-1(9a),3(3a),9-<br>Hexahydromonosporascone ( <b>100</b> )                                 | 250 | C <sub>13</sub> H <sub>14</sub> O <sub>5</sub> | <i>Teratosphaeria</i> sp. FL2137           | <i>Pinus clausa</i> (Leaves, Pinaceae)             | The ground of a<br>pine-dominated<br>scrub forest,<br>Archbold<br>Biological<br>Station in<br>Florida, USA | [152] |
| (+)-4,8-Dihydroxy-7-(2-hydroxy-ethyl)-6-<br>methoxy-3,4-dihydro-2H-naphthalen-1-one<br>( <b>101</b> ) | 252 | C <sub>13</sub> H <sub>16</sub> O <sub>5</sub> | <i>Leptosphaerulina<br/>chartarum</i> 3608 | Crinoid (Marine animal, Crinoidea)                 | Xuwen,<br>Zhanjiang City,<br>Guangdong,<br>China                                                           | [91]  |
| (-)-Leptothalenone A ( <b>102</b> )                                                                   | 252 | C <sub>13</sub> H <sub>16</sub> O <sub>5</sub> | <i>Leptosphaerulina<br/>chartarum</i> 3608 | Crinoid (Marine animal, Crinoidea)                 | Xuwen,<br>Zhanjiang City,<br>Guangdong,<br>China                                                           | [91]  |
| (+)-Leptothalenone A ( <b>103</b> )                                                                   | 252 | C <sub>13</sub> H <sub>16</sub> O <sub>5</sub> | <i>Leptosphaerulina<br/>chartarum</i> 3608 | Crinoid (Marine animal, Crinoidea)                 | Xuwen,<br>Zhanjiang City,                                                                                  | [91]  |

|                                                      |     |                                                |                              |                                                  |                                                                        |                  |
|------------------------------------------------------|-----|------------------------------------------------|------------------------------|--------------------------------------------------|------------------------------------------------------------------------|------------------|
|                                                      |     |                                                |                              |                                                  |                                                                        | Guangdong, China |
| 4-Hydroxydihydronorjavanicin ( <b>104</b> )          | 280 | C <sub>14</sub> H <sub>16</sub> O <sub>6</sub> | <i>Fusarium</i> sp. BCC14842 | <i>Bambusa vulgaris</i> (Bamboo leaf, Poaceae)   | Bamboo forest at Nam Nao National Park, Phetchabun Province, Thailand. | [75]             |
| 5-Hydroxydihydrofusarubin ( <b>105</b> )             | 310 | C <sub>15</sub> H <sub>18</sub> O <sub>7</sub> | <i>Fusarium solani</i> T-127 | Cultured                                         | Japan                                                                  | [160]            |
| 5-Hydroxydihydrofusarubin A ( <b>106</b> )           | 310 | C <sub>15</sub> H <sub>18</sub> O <sub>7</sub> | <i>Fusarium</i> sp. BCC14842 | <i>Bambusa vulgaris</i> (Bamboo leaf, Poaceae)   | Bamboo forest at Nam Nao National Park, Phetchabun Province, Thailand. | [75]             |
| 5-Hydroxy-3-Methoxydihydrofusarubin A ( <b>107</b> ) | 324 | C <sub>16</sub> H <sub>20</sub> O <sub>7</sub> | <i>Fusarium</i> sp. BCC14842 | <i>Bambusa vulgaris</i> (Bamboo leaf, Poaceae)   | Bamboo forest at Nam Nao National Park, Phetchabun Province, Thailand  | [75]             |
| 5-Hydroxydihydrofusarubin D ( <b>108</b> )           | 310 | C <sub>15</sub> H <sub>18</sub> O <sub>7</sub> | <i>Fusarium</i> sp. BCC14842 | <i>Bambusa vulgaris</i> (Bamboo leaf, Poaceae)   | Bamboo forest at Nam Nao National Park, Phetchabun Province, Thailand. | [75]             |
|                                                      |     |                                                | <i>Penicillium polonicum</i> | <i>Camptotheca acuminata</i> , roots (Nyssaceae) | South Central University for Nationalities, Wuhan, Hubei, China        | [161]            |
| 5-Hydroxy-3-methoxydihydrofusarubin D ( <b>109</b> ) | 324 | C <sub>16</sub> H <sub>20</sub> O <sub>7</sub> | <i>Fusarium</i> sp. BCC14842 | <i>Bambusa vulgaris</i> (Bamboo leaf, Poaceae)   | Bamboo forest at Nam Nao                                               | [75]             |

|                                       |     |                                                |                              |                                                   |                                                                                       |      |
|---------------------------------------|-----|------------------------------------------------|------------------------------|---------------------------------------------------|---------------------------------------------------------------------------------------|------|
|                                       |     |                                                |                              |                                                   | National Park,<br>Phetchabun<br>Province,<br>Thailand.                                |      |
| 3,5-Dimethoxydihydrofusarubin D (110) | 338 | C <sub>17</sub> H <sub>22</sub> O <sub>7</sub> | <i>Fusarium</i> sp. BCC14842 | <i>Bambusa vulgaris</i> (Bamboo leaf,<br>Poaceae) | Bamboo forest at<br>Nam Nao<br>National Park,<br>Phetchabun<br>Province,<br>Thailand. | [75] |
| 5-Hydroxydihydrofusarubin B (111)     | 310 | C <sub>15</sub> H <sub>18</sub> O <sub>7</sub> | <i>Fusarium</i> sp. BCC14842 | <i>Bambusa vulgaris</i> (Bamboo leaf,<br>Poaceae) | Bamboo forest at<br>Nam Nao<br>National Park,<br>Phetchabun<br>Province,<br>Thailand. | [75] |
| 5-Methoxydihydrofusarubin B (112)     | 324 | C <sub>16</sub> H <sub>20</sub> O <sub>7</sub> | <i>Fusarium</i> sp. BCC14842 | <i>Bambusa vulgaris</i> (Bamboo leaf,<br>Poaceae) | Bamboo forest at<br>Nam Nao<br>National Park,<br>Phetchabun<br>Province,<br>Thailand. | [75] |
| 3,5-Dimethoxydihydrofusarubin B (113) | 338 | C <sub>17</sub> H <sub>22</sub> O <sub>7</sub> | <i>Fusarium</i> sp. BCC14842 | <i>Bambusa vulgaris</i> (Bamboo leaf,<br>Poaceae) | Bamboo forest at<br>Nam Nao<br>National Park,<br>Phetchabun<br>Province,<br>Thailand. | [75] |
| 5-Hydroxydihydrofusarubin C (114)     | 310 | C <sub>15</sub> H <sub>18</sub> O <sub>7</sub> | <i>Fusarium</i> sp. BCC14842 | <i>Bambusa vulgaris</i> (Bamboo leaf,<br>Poaceae) | Bamboo forest at<br>Nam Nao<br>National Park,<br>Phetchabun<br>Province,<br>Thailand. | [75] |



|                       |     |                                                |                                        |                                                      |                                             |       |
|-----------------------|-----|------------------------------------------------|----------------------------------------|------------------------------------------------------|---------------------------------------------|-------|
| Lentiquinone B (115)  | 292 | C <sub>15</sub> H <sub>16</sub> O <sub>6</sub> | <i>Ascochyta lentis</i>                | <i>Lens culinaris</i> (Lentil, Fabaceae)             | USA                                         | [47]  |
| Lentiquinone C (116)  | 292 | C <sub>15</sub> H <sub>16</sub> O <sub>6</sub> | <i>Ascochyta lentis</i>                | <i>Lens culinaris</i> (Lentil, Fabaceae)             | USA                                         | [47]  |
| Pleosporalin H (117)  | 282 | C <sub>14</sub> H <sub>18</sub> O <sub>6</sub> | <i>Pleosporales</i> sp. F46            | <i>Mahonia fortune</i> (Pedicel, Berberidaceae)      | Qingdao, China                              | [145] |
| Pleosporalin I (118)  | 250 | C <sub>13</sub> H <sub>14</sub> O <sub>5</sub> | <i>Pleosporales</i> sp. F46            | <i>Mahonia fortune</i> (Pedicel, Berberidaceae)      | Qingdao, China                              | [145] |
| Biatriosporin A (119) | 280 | C <sub>15</sub> H <sub>20</sub> O <sub>5</sub> | <i>Biatriospora</i> sp. 8331C          | <i>Pseudosyphellaria</i> sp. (Lichen, Lobariaceae)   | Changbai Mountain, Jilin, China             | [157] |
| Biatriosporin B (120) | 266 | C <sub>14</sub> H <sub>18</sub> O <sub>5</sub> | <i>Biatriospora</i> sp. 8331C          | <i>Pseudosyphellaria</i> sp. (Lichen, Lobariaceae)   | Changbai Mountain, Jilin, China             | [157] |
| Biatriosporin C (121) | 266 | C <sub>14</sub> H <sub>18</sub> O <sub>5</sub> | <i>Biatriospora</i> sp. 8331C          | <i>Pseudosyphellaria</i> sp. (Lichen, Lobariaceae)   | Changbai Mountain, Jilin, China             | [157] |
| Biatriosporin G (122) | 308 | C <sub>16</sub> H <sub>20</sub> O <sub>6</sub> | <i>Biatriospora</i> sp. 8331C          | <i>Pseudosyphellaria</i> sp. (Lichen, Lobariaceae)   | Changbai Mountain, Jilin, China             | [157] |
| Biatriosporin H (123) | 308 | C <sub>16</sub> H <sub>20</sub> O <sub>6</sub> | <i>Biatriospora</i> sp. 8331C          | <i>Pseudosyphellaria</i> sp. (Lichen, Lobariaceae)   | Changbai Mountain, Jilin, China             | [157] |
| Biatriosporin I (124) | 278 | C <sub>15</sub> H <sub>18</sub> O <sub>5</sub> | <i>Biatriospora</i> sp. 8331C          | <i>Pseudosyphellaria</i> sp. (Lichen, Lobariaceae)   | Changbai Mountain, Jilin, China             | [157] |
| Biatriosporin J (125) | 276 | C <sub>15</sub> H <sub>16</sub> O <sub>5</sub> | <i>Biatriospora</i> sp. 8331C          | <i>Pseudosyphellaria</i> sp. (Lichen, Lobariaceae)   | Changbai Mountain, Jilin, China             | [157] |
| Pleorubrin B (126)    | 278 | C <sub>15</sub> H <sub>18</sub> O <sub>5</sub> | <i>Biatriospora</i> sp. CCF 4378       | <i>Ulmus laevis</i> (Twigs, Ulmaceae)                | Libicky Luh Forest near Velky Osek, Czech   | [162] |
| Aspvanicin A (127)    | 294 | C <sub>15</sub> H <sub>18</sub> O <sub>6</sub> | <i>Aspergillus versicolor</i> KU258497 | <i>Eichhornia crassipes</i> (Leaves, Pontederiaceae) | Shores of the River Nile in Mansoura, Egypt | [89]  |

|                                                                      |     |                                                |                                        |                                                                |                                             |       |
|----------------------------------------------------------------------|-----|------------------------------------------------|----------------------------------------|----------------------------------------------------------------|---------------------------------------------|-------|
| Aspvanicin B (128)                                                   | 294 | C <sub>15</sub> H <sub>18</sub> O <sub>6</sub> | <i>Aspergillus versicolor</i> KU258497 | <i>Eichhornia crassipes</i> (Leaves, Pontederiaceae)           | Shores of the River Nile in Mansoura, Egypt | [89]  |
| Methylberchemiaside (129)                                            | 354 | C <sub>17</sub> H <sub>22</sub> O <sub>8</sub> | <i>Colletotrichum</i> sp. GDMU-1       | <i>Santalum album</i> (Leaves, Santalaceae)                    | Dongguan, Guangdong, China                  | [112] |
| Phomonaphthalenone A (130)                                           | 292 | C <sub>15</sub> H <sub>16</sub> O <sub>6</sub> | <i>Phomopsis</i> sp. HCCB04730         | <i>Stephaniae Japonicae</i> (Stems, Menispermaceae)            | Jin Hua, Zhejiang, China                    | [90]  |
| Daldionin (131)                                                      | 318 | C <sub>20</sub> H <sub>14</sub> O <sub>4</sub> | <i>Daldinia eschscholtzii</i>          | <i>Paphiopedilum exul</i> (Orchid roots, Orchidaceae)          | Chiang Mai, Thailand                        | [21]  |
| 6-Ethyl-1-acetonyl-1,5-dihydroxy-2,7-dimethoxy-4-naphthalenone (132) | 320 | C <sub>17</sub> H <sub>20</sub> O <sub>6</sub> | <i>Guignardia laricina</i>             | <i>Larix leptolepis</i> (Pinaceae)                             | Japan                                       | [48]  |
|                                                                      |     |                                                | <i>Perenniporia</i> sp.                | <i>Euops chinesis</i> (Leaf-rolling weevil larva, Attelabidae) | Mingyue Mountain, Jiangxi, China            | [73]  |
| Delitschiapyrone A (133)                                             | 458 | C <sub>24</sub> H <sub>26</sub> O <sub>9</sub> | <i>Delitschia</i> sp. FL1581           | <i>Serenoa repens</i> (Fallen leaf of saw palmetto, Arecaceae) | pine-dominated forest, central Florida, USA | [28]  |
| Variabilone (134)                                                    | 228 | C <sub>15</sub> H <sub>16</sub> O <sub>2</sub> | <i>Paraconiothyrium variabile</i>      | <i>Cephalotaxus harringtonia</i> (Taxaceae)                    | France                                      | [76]  |
| Juglanone C (135)                                                    | 338 | C <sub>20</sub> H <sub>18</sub> O <sub>5</sub> | <i>Phialocephala fortinii</i>          | <i>Pamelia</i> sp. (Lichen, Parmeliaceae)                      | Mount Qingliang, Zhejiang, China            | [137] |
| Juglanone D (136)                                                    | 340 | C <sub>20</sub> H <sub>20</sub> O <sub>5</sub> | <i>Phialocephala fortinii</i>          | <i>Pamelia</i> sp. (Lichen, Parmeliaceae)                      | Mount Qingliang, Zhejiang, China            | [137] |
| Juglanone E (137)                                                    | 340 | C <sub>20</sub> H <sub>20</sub> O <sub>5</sub> | <i>Phialocephala fortinii</i>          | <i>Pamelia</i> sp. (Lichen, Parmeliaceae)                      | Mount Qingliang, Zhejiang, China            | [137] |
| (4S,10R,4'S)-Leptothalenone B (138)                                  | 472 | C <sub>25</sub> H <sub>28</sub> O <sub>9</sub> | <i>Leptosphaerulina chartarum</i> 3608 | (Marine animal, Crinoidea)                                     | Xuwen, Zhanjiang City, Guangdong, China     | [91]  |
| (4R,10S,4'S)-Leptothalenone B (139)                                  | 472 | C <sub>25</sub> H <sub>28</sub> O <sub>9</sub> | <i>Leptosphaerulina chartarum</i> 3608 | Crinoid (Marine animal, Crinoidea)                             | Xuwen, Zhanjiang City,                      | [91]  |

|                                     |     |                                                 |                                        |                                                                          |                                           |                  |
|-------------------------------------|-----|-------------------------------------------------|----------------------------------------|--------------------------------------------------------------------------|-------------------------------------------|------------------|
|                                     |     |                                                 |                                        |                                                                          |                                           | Guangdong, China |
| Xylarinap A (140)                   | 365 | C <sub>21</sub> H <sub>19</sub> NO <sub>5</sub> | <i>Xylaria nigripes</i>                | Fresh fruiting bodies                                                    | Ailao Moutain, Yunnan, China              | [29]             |
| Xylarinap B (141)                   | 336 | C <sub>20</sub> H <sub>16</sub> O <sub>5</sub>  | <i>Xylaria nigripes</i>                | Fresh fruiting bodies                                                    | Ailao Moutain, Yunnan, China              | [29]             |
| Xylarinap C (142)                   | 336 | C <sub>20</sub> H <sub>16</sub> O <sub>5</sub>  | <i>Xylaria nigripes</i>                | Fresh fruiting bodies                                                    | Ailao Moutain, Yunnan, China              | [29]             |
| Xylarinap D (143)                   | 350 | C <sub>21</sub> H <sub>18</sub> O <sub>5</sub>  | <i>Xylaria nigripes</i>                | Fresh fruiting bodies                                                    | Ailao Moutain, Yunnan, China              | [29]             |
| Xylarinap E (144)                   | 350 | C <sub>21</sub> H <sub>18</sub> O <sub>5</sub>  | <i>Xylaria nigripes</i>                | Fresh fruiting bodies                                                    | Ailao Moutain, Yunnan, China              | [29]             |
| Cladosporol (= Cladosporol A) (145) | 352 | C <sub>20</sub> H <sub>16</sub> O <sub>6</sub>  | <i>Cladosporium cladosporioides</i>    | <i>Lactuca sativa</i> L. (Seedlings, Asteraceae)                         | Japan                                     | [163]            |
|                                     |     |                                                 | <i>Cladosporium cladosporioides</i>    | <i>Phytophthora capsici</i> (Peronosporaceae)                            |                                           | [164]            |
|                                     |     |                                                 | <i>Cladosporium. tenuissimum</i> Cooke | -                                                                        | -                                         | [165]            |
|                                     |     |                                                 | <i>Cladosporium tenuissimum</i> Cooke  | <i>Pinus pinaster</i> (Pinaceae)                                         | Tuscany, Italy                            | [166]            |
|                                     |     |                                                 | <i>Cladosporium</i> sp. KcFL6'         | <i>Kandelia candel</i> (Rhizophoraceae)                                  | Daya Bay, Shenzhen city, Guangdong, China | [77]             |
|                                     |     |                                                 | <i>Cladosporium</i> sp. TMPU1621       | <i>Achyranthes aspera</i> var. <i>rubrofusca</i> (Leaves, Amaranthaceae) | Okinawan, Japan                           | [167]            |
|                                     |     |                                                 | <i>C. cladosporioides</i> MRCJ-314     | <i>Datura innoxia</i> (Roots, Solanaceae)                                | Jammu, India                              | [94]             |
| Cladosporol B (146)                 | 350 | C <sub>20</sub> H <sub>14</sub> O <sub>6</sub>  | <i>C. tenuissimum</i> Cooke            | <i>Pinus pinaster</i> (Pinaceae)                                         | Tuscany, Italy                            | [166]            |
|                                     |     |                                                 | <i>Cladosporium</i> sp. TMPU1621       | <i>Achyranthes aspera</i> var. <i>rubrofusca</i> (Leaves, Amaranthaceae) | Okinawan, Japan                           | [167]            |
| Cladosporol C (147)                 | 338 | C <sub>20</sub> H <sub>18</sub> O <sub>5</sub>  | <i>C. tenuissimum</i> Cooke            | <i>Pinus pinaster</i> (Pinaceae)                                         | Tuscany, Italy                            | [166]            |
|                                     |     |                                                 | <i>Cladosporium</i> sp. KcFL6'         | <i>Kandelia candel</i> (Rhizophoraceae)                                  | Daya Bay, Shenzhen city,                  | [77]             |

|                                                |     |                                                  |                                                  |                                                                          |                                                |
|------------------------------------------------|-----|--------------------------------------------------|--------------------------------------------------|--------------------------------------------------------------------------|------------------------------------------------|
|                                                |     |                                                  |                                                  | Guangdong, China                                                         |                                                |
|                                                |     |                                                  | <i>C. cladosporioides</i> HDN14-342              | Sediment                                                                 | Indian Ocean, Qingdao, China [95]              |
|                                                |     |                                                  | <i>C. cladosporioides</i> EN-399                 | <i>Laurencia okamura</i> (Rhodomelaceae)                                 | Qingdao, China [78]                            |
|                                                |     |                                                  | <i>Cladosporium</i> sp. TMPU1621                 | <i>Achyranthes aspera</i> var. <i>rubrofusca</i> (Leaves, Amaranthaceae) | Okinawan, Japan [167]                          |
|                                                |     |                                                  | <i>Cladosporium</i> sp. JS1-2                    | <i>Ceriops tagal</i> (Rhizophoraceae)                                    | Dongzhaigang, Hainan, China [79]               |
|                                                |     |                                                  | <i>Cladosporium cladosporioides</i> MCCC 3A00182 | Sediment                                                                 | Southwest Pacific Ocean [115]                  |
| Cladosporol D (148)                            | 354 | C <sub>20</sub> H <sub>18</sub> O <sub>6</sub>   | <i>Cladosporium tenuissimum</i> Cooke            | <i>Pinus pinaster</i> (Pinaceae)                                         | Tuscany, Italy [166]                           |
|                                                |     |                                                  | <i>Cladosporium</i> sp. KcFL6'                   | <i>Kandelia candel</i> (Rhizophoraceae)                                  | Daya Bay, Shenzhen city, Guangdong, China [77] |
|                                                |     |                                                  | <i>Cladosporium</i> sp. TMPU1621                 | <i>Achyranthes aspera</i> var. <i>rubrofusca</i> (Leaves, Amaranthaceae) | Okinawan, Japan [167]                          |
| Cladosporol E (149)                            | 370 | C <sub>20</sub> H <sub>18</sub> O <sub>7</sub>   | <i>Cladosporium tenuissimum</i> Cooke            | <i>Pinus pinaster</i> (Pinaceae)                                         | Tuscany, Italy [166]                           |
|                                                |     |                                                  | <i>Cladosporium cladosporioides</i> HDN14-342    | Sediment                                                                 | Indian Ocean, Qingdao, China [95]              |
|                                                |     |                                                  | <i>Cladosporium</i> sp. JS1-2                    | <i>Ceriops tagal</i> (Rhizophoraceae)                                    | Dongzhaigang, Hainan, China [79]               |
| Cladosporol F (150)                            | 352 | C <sub>21</sub> H <sub>20</sub> O <sub>5</sub>   | <i>Cladosporium cladosporioides</i> HDN14-342    | Sediment                                                                 | Indian Ocean, Qingdao, China [95]              |
|                                                |     |                                                  | <i>C. cladosporioides</i> EN-399                 | <i>Laurencia okamura</i> (Rhodomelaceae)                                 | Qingdao, China [78]                            |
|                                                |     |                                                  | <i>Cladosporium</i> sp. TMPU1621                 | <i>Achyranthes aspera</i> var. <i>rubrofusca</i> (Leaves, Amaranthaceae) | Okinawan, Japan [167]                          |
| Cladosporol G (= 2-Chloro-cladosporol D) (151) | 388 | C <sub>20</sub> H <sub>17</sub> ClO <sub>6</sub> | <i>Cladosporium</i> sp. TMPU1621                 | <i>Achyranthes aspera</i> var. <i>rubrofusca</i> (Leaves, Amaranthaceae) | Okinawan, Japan [167]                          |

|                                         |     |                                                  |                                                  |                                                        |                                                    |       |
|-----------------------------------------|-----|--------------------------------------------------|--------------------------------------------------|--------------------------------------------------------|----------------------------------------------------|-------|
|                                         | 388 | C <sub>20</sub> H <sub>17</sub> ClO <sub>6</sub> | <i>Cladosporium cladosporioides</i><br>HDN14-342 | Sediment                                               | Indian Ocean,<br>Qingdao, China                    | [95]  |
| Cladosporol G (152)                     | 352 | C <sub>21</sub> H <sub>20</sub> O <sub>5</sub>   | <i>Cladosporium cladosporioides</i><br>EN-399    | <i>Laurencia okamurai</i> (Rhodomelaceae)              | Qingdao, China                                     | [78]  |
| Cladosporol H (153)                     | 336 | C <sub>20</sub> H <sub>16</sub> O <sub>5</sub>   | <i>Cladosporium cladosporioides</i><br>EN-399    | <i>Laurencia okamurai</i> (Rhodomelaceae)              | Qingdao, China                                     | [78]  |
| Cladosporol I (= Cladosperanol A) (154) | 338 | C <sub>20</sub> H <sub>18</sub> O <sub>5</sub>   | <i>Cladosporium cladosporioides</i><br>EN-399    | <i>Laurencia okamurai</i> (Rhodomelaceae)              | Qingdao, China                                     | [78]  |
|                                         |     |                                                  | <i>Cladosporium</i> sp. KFD33                    | Blood cockle (Cardiidae)                               | Haikou Bay,<br>China                               | [80]  |
|                                         |     |                                                  | <i>Cladosporium perangustum</i> FS62             | Marine-derived fungus                                  | China                                              | [168] |
| Cladosporol J (155)                     | 338 | C <sub>20</sub> H <sub>18</sub> O <sub>5</sub>   | <i>Cladosporium cladosporioides</i><br>EN-399    | <i>Laurencia okamurai</i> (Rhodomelaceae)              | Qingdao, China                                     | [78]  |
| Altertoxin XII (156)                    | 322 | C <sub>20</sub> H <sub>18</sub> O <sub>4</sub>   | <i>Cladosporium</i> sp. KFD33                    | <i>Tegillarca granosa</i> (Blood cockle,<br>Cardiidae) | Haikou Bay,<br>China                               | [80]  |
| Cladosporone A (157)                    | 352 | C <sub>20</sub> H <sub>16</sub> O <sub>6</sub>   | <i>Cladosporium</i> sp. KcFL6'                   | <i>Kandelia candel</i> (Rhizophoraceae)                | Daya Bay,<br>Shenzhen city,<br>Guangdong,<br>China | [77]  |
| Clindanone A (158)                      | 394 | C <sub>22</sub> H <sub>18</sub> O <sub>7</sub>   | <i>Cladosporium cladosporioides</i><br>HDN14-342 | Sediment                                               | Indian Ocean,<br>Qingdao, China                    | [95]  |
| Clindanone B (159)                      | 394 | C <sub>22</sub> H <sub>18</sub> O <sub>7</sub>   | <i>Cladosporium cladosporioides</i><br>HDN14-342 | Sediment                                               | Indian Ocean,<br>Qingdao, China                    | [95]  |

Table S2. Biological activities of fungal naphthalenones.

| Compound name                                                | Biological activity              | Assay, organism, or cell line                           | Inhibitory concentration              | Positive control                                                                                   | Ref.  |
|--------------------------------------------------------------|----------------------------------|---------------------------------------------------------|---------------------------------------|----------------------------------------------------------------------------------------------------|-------|
| 3,4-Dihydro-3,4,8-trihydroxy-1(2H)-naphthalenone (1)         | $\alpha$ -Glucosidase inhibitory | Spectrophotometer/ $\alpha$ -Glucosidase enzyme         | 34.88 $\mu$ M (IC <sub>50</sub> )     | Acarbose 427.34 $\mu$ M (IC <sub>50</sub> )                                                        | [82]  |
| (3R,4S)-3,4,8-Trihydroxy-3,4-dihydronaphthalen-1(2H)-one (3) | Immunosuppressive                | Immunoassay/IMPDH                                       | 4.1 $\mu$ M (IC <sub>50</sub> )       | Mycophenolic acid 0.4 $\mu$ M (IC <sub>50</sub> )                                                  | [134] |
|                                                              | Immunosuppressive                | Radioactively labeled phosphoprotein/PTPIB              | 13.9 $\mu$ M (IC <sub>50</sub> )      | Ursolic acid 2.8 $\mu$ M (IC <sub>50</sub> )                                                       | [134] |
|                                                              | Antifungal                       | Broth dilution/ <i>C. albicans</i>                      | 63.2 $\mu$ g/mL (IC <sub>50</sub> )   | Amphotericin B 1.3 $\mu$ g/mL (IC <sub>50</sub> )                                                  | [63]  |
|                                                              | Antitumor                        | Immune complex phosphatase/SHP2                         | 41.2 $\mu$ M (IC <sub>50</sub> )      | Ursolic acid 2.8 $\mu$ M (IC <sub>50</sub> )                                                       | [134] |
| (2S,4S)-3,4-Dihydro-2,4,8-trihydroxy-1(2H)-naphthalenone (4) | $\alpha$ -Glucosidase inhibitory | Colorimetric/ $\alpha$ -Glucosidase enzyme              | 102.34 $\mu$ M (IC <sub>50</sub> )    | Acarbose 427.34 $\mu$ M (IC <sub>50</sub> )                                                        | [82]  |
| 4,6-Dihydroxy - 3,4-dihydronaphthalen-1(2H)-one (8)          | Nematocidal                      | Nematotoxin bioassay/ <i>Bursaphelenchus xylophilus</i> | 1169.8 mg/L (LC <sub>50</sub> , 12 h) |                                                                                                    | [52]  |
|                                                              |                                  |                                                         | 461.3 mg/L (LC <sub>50</sub> , 24 h)  |                                                                                                    | [52]  |
|                                                              |                                  |                                                         | 229.6 mg/L (LC <sub>50</sub> , 36 h)  |                                                                                                    | [52]  |
| 4,8-dihydroxy-3,4-dihydronaphthalen-1(2H)-one (9)            | Nematocidal                      | Nematotoxin bioassay/ <i>Bursaphelenchus xylophilus</i> | 540.2 mg/L (LC <sub>50</sub> , 12 h)  |                                                                                                    | [52]  |
|                                                              |                                  |                                                         | 436.6 mg/L (LC <sub>50</sub> , 24 h)  |                                                                                                    | [52]  |
|                                                              |                                  |                                                         | 209.7 mg/L (LC <sub>50</sub> , 36 h)  |                                                                                                    | [52]  |
| 4(S)-(+)-Isosclerone acetate (10)                            | Antibacterial                    | Agar diffusion assay/ <i>B. megaterium</i>              | 15.0 mm (IZD)                         | Penicillin 28.0 mm (IZD)                                                                           | [60]  |
|                                                              | Antimycobacterial                | MABA/ <i>Mycobacterium tuberculosis</i> H37 Ra          | 50 $\mu$ g/mL (MIC)                   | Isoniazid 0.05 $\mu$ g/mL (MIC)<br>Kanamycin 2.5 $\mu$ g/mL (MIC)                                  | [61]  |
|                                                              | Cytotoxicity                     | SRB/BCA                                                 | 11.27 $\mu$ g/mL (IC <sub>50</sub> )  | Ellipticine 0.11 $\mu$ g/mL (IC <sub>50</sub> )<br>Doxorubicin 0.21 $\mu$ g/mL (IC <sub>50</sub> ) | [61]  |
|                                                              |                                  | MTT/NCI-H187                                            | 7.29 $\mu$ g/mL (IC <sub>50</sub> )   | Ellipticine 0.32 $\mu$ g/mL (IC <sub>50</sub> )<br>Doxorubicin 0.02 $\mu$ g/mL (IC <sub>50</sub> ) | [61]  |
|                                                              |                                  | SRB/Vero                                                | 41.84 $\mu$ g/mL (IC <sub>50</sub> )  | Ellipticine 0.7 $\mu$ g/mL (IC <sub>50</sub> )                                                     | [61]  |

|                                                                                    |                   |                                                         |                                       |                                                    |      |
|------------------------------------------------------------------------------------|-------------------|---------------------------------------------------------|---------------------------------------|----------------------------------------------------|------|
| (3S,4R)-4,8-dihydroxy-3-methoxy-3,4-dihydro-1(2H)-naphthalenone (13)               | Antimycobacterial | MABA/ <i>Mycobacterium tuberculosis</i> H37 Ra          | 12.5 µg/mL (MIC)                      | Isoniazid 0.05 µg/mL (MIC)                         | [61] |
|                                                                                    | Cytotoxicity      | SRB/BCA                                                 | 19.16 µg/mL (IC <sub>50</sub> )       | Kanamycin 2.5 µg/mL (MIC)                          | [61] |
|                                                                                    |                   | MTT/NCI-H187                                            | 2.86 µg/mL (IC <sub>50</sub> )        | Ellipticine 0.11 µg/mL (IC <sub>50</sub> )         | [61] |
|                                                                                    |                   | SRB/Vero                                                | 26.59 µg/mL (IC <sub>50</sub> )       | Doxorubicin 0.21 µg/mL (IC <sub>50</sub> )         | [61] |
| 3,8-dihydroxy-3,4-dihydronaphthalen-1(2H)-one (14)                                 | Antimycobacterial | MABA/ <i>Mycobacterium tuberculosis</i> H37 Ra          | 50 µg/mL (MIC)                        | Ellipticine 0.32 µg/mL (IC <sub>50</sub> )         | [61] |
|                                                                                    |                   | MTT/NCI-H187                                            | 15.33 µg/mL (IC <sub>50</sub> )       | Doxorubicin 0.02 µg/mL (IC <sub>50</sub> )         | [61] |
|                                                                                    |                   |                                                         |                                       |                                                    |      |
| 3,4,6,8-Tetrahydroxy-3,4-dihydronaphthalen-1(2H)-one (cis-4-hydroxyscytalone) (19) | Nematocidal       | Nematotoxin bioassay/ <i>Bursaphelenchus xylophilus</i> | 844.9 mg/L (LC <sub>50</sub> , 12 h)  |                                                    | [52] |
|                                                                                    |                   |                                                         | 468.4 mg/L (LC <sub>50</sub> , 24 h)  |                                                    | [52] |
|                                                                                    |                   |                                                         | 206.1 mg/L (LC <sub>50</sub> , 36 h)  |                                                    | [52] |
| 4,6,8-Trihydroxy-3,4-dihydronaphthalen-1(2H)-one (22)                              | Nematocidal       | Nematotoxin bioassay/ <i>Bursaphelenchus xylophilus</i> | 1011.6 mg/L (LC <sub>50</sub> , 12 h) |                                                    | [52] |
|                                                                                    |                   |                                                         | 522.5 mg/L (LC <sub>50</sub> , 24 h)  |                                                    | [52] |
|                                                                                    |                   |                                                         | 220.3 mg/L (LC <sub>50</sub> , 36 h)  |                                                    | [52] |
|                                                                                    |                   |                                                         |                                       |                                                    |      |
|                                                                                    | Antimycobacterial | MABA/ <i>Mycobacterium tuberculosis</i> H37 Ra          | 12.5 µg/mL (MIC)                      | Isoniazid 0.05 µg/mL (MIC)                         | [61] |
|                                                                                    | Cytotoxicity      | SRB/BCA                                                 | 2.96 µg/mL (IC <sub>50</sub> )        | Kanamycin 2.5 µg/mL (MIC)                          | [61] |
|                                                                                    |                   | MTT/NCI-H187                                            | 5.55 µg/mL (IC <sub>50</sub> )        | Ellipticine 0.11 µg/mL (IC <sub>50</sub> )         | [61] |
|                                                                                    |                   | SRB/Vero                                                | 24.35 µg/mL (IC <sub>50</sub> )       | Doxorubicin 0.21 µg/mL (IC <sub>50</sub> )         | [61] |
| (R)-4,6,8-Trihydroxy-3,4-dihydro-1(2H)-naphthalenone (25)                          | Antibacterial     | Broth dilution/ <i>B. subtilis</i>                      | 104.2 µg/mL (IC <sub>50</sub> )       | Ellipticine 0.32 µg/mL (IC <sub>50</sub> )         | [61] |
|                                                                                    | Antifungal        | Broth dilution/ <i>C. albicans</i>                      | 78.2 µg/mL (IC <sub>50</sub> )        | Doxorubicin 0.02 µg/mL (IC <sub>50</sub> )         | [61] |
| (3S,4S)-3,4,8-trihydroxy-6-methoxy-3,4-dihydro-1(2H)-naphthalenone (31)            | Antimycobacterial | MABA/ <i>Mycobacterium tuberculosis</i> H37 Ra          | 25.0 µg/mL (MIC)                      | Streptomycin sulfate 5.2 µg/mL (IC <sub>50</sub> ) | [63] |
|                                                                                    | Cytotoxicity      | SRB/BCA                                                 | 7.24 µg/mL (IC <sub>50</sub> )        | Amphotericin B 1.3 µg/mL (IC <sub>50</sub> )       | [63] |

|                                                                                            |                                                 |                                                                                                                 |                                 |                                                                                          |       |
|--------------------------------------------------------------------------------------------|-------------------------------------------------|-----------------------------------------------------------------------------------------------------------------|---------------------------------|------------------------------------------------------------------------------------------|-------|
|                                                                                            |                                                 | MTT/NCI-H187                                                                                                    | 12.08 µg/mL (IC <sub>50</sub> ) | Ellipticine 0.32 µg/mL (IC <sub>50</sub> )<br>Doxorubicin 0.02 µg/mL (IC <sub>50</sub> ) | [61]  |
|                                                                                            |                                                 | SRB/Vero                                                                                                        | 26.35 µg/mL (IC <sub>50</sub> ) | Ellipticine 0.7 µg/mL (IC <sub>50</sub> )                                                | [61]  |
| (3R,4R)-3-methoxyl-botryosphaerone (54)                                                    | D Indoleamine 2, 3-dioxygenase (IDO) inhibitory | High-Throughput Fluorescence assay/L-tryptophan                                                                 | 6.36 µM (IC <sub>50</sub> )     | Epacadostat 0.5 µM (IC <sub>50</sub> )                                                   | [107] |
| (3R*,4S*)-7-Ethyl-3,4,6,8-tetrahydroxy-3,4-dihydronaphthalen-1(2H)-one (61)                | Antifungal                                      | Agar diffusion/ <i>Alternaria</i> sp. YMF 1.01991                                                               | 7.0 mm (IZD)                    | Ciclopirox 26.0 mm (IZD)                                                                 | [67]  |
|                                                                                            | Antifungal                                      | Agar diffusion/ <i>Sclerotium</i> sp. YMF 1.01993                                                               | 8.0 mm (IZD)                    | Ciclopirox 19.0 mm (IZD)                                                                 | [67]  |
|                                                                                            | Antifungal                                      | Agar diffusion/ <i>Fusarium</i> sp. YMF 1.01996                                                                 | 7.0 mm (IZD)                    | Ciclopirox 20.0 mm (IZD)                                                                 | [67]  |
|                                                                                            | Antibacterial                                   | Agar diffusion/ <i>B. cereus</i> YMF 3.19                                                                       | 12.0 mm (IZD)                   | Ampicillin sodium 35.0 mm (IZD)                                                          | [67]  |
|                                                                                            | Antibacterial                                   | Agar diffusion/ <i>B. laterosporus</i> YMF 3.08                                                                 | 10.0 mm (IZD)                   | Ampicillin sodium 30.0 mm (IZD)                                                          | [67]  |
|                                                                                            | Antibacterial                                   | Agar diffusion/ <i>S. aureus</i> YMF 3.17                                                                       | 20.0 mm (IZD)                   | Ampicillin sodium 19.0 mm (IZD)                                                          | [67]  |
| Nodulone (63)                                                                              | Cytotoxicity                                    | MTT/Mouse splenic lymphocytes                                                                                   | 11.2 µg/mL (IC <sub>50</sub> )  | Cyclosporine A 0.06 µg/mL (IC <sub>50</sub> )                                            | [27]  |
| (-)-cis-(7R*,8S*)-4,7,8-Trihydroxy-3,6,7,8-tetrahydronaphtho[2,3-c]furan-5(1H)-one (64)    | Antimalarial                                    | Microculture radioisotope-[ <sup>3</sup> H]-hypoxanthine/ <i>P. falciparum</i> (K1, multidrug-resistant strain) | 3.125 µg/mL (IC <sub>50</sub> ) | Dihydroartemisinin 1.91 nM (IC <sub>50</sub> )<br>Mefloquine 24.7 nM (IC <sub>50</sub> ) | [66]  |
|                                                                                            | Antimycobacterial                               | GFPMA/ <i>Mycobacterium tuberculosis</i> H37 Ra                                                                 | 11.3 µg/mL (IC <sub>50</sub> )  | Rifampicin, ofloxacin, streptomycin, isoniazid, and ethambutol                           | [66]  |
| 3,6,8-Trihydroxy-3-[3,5-dimethyl-2-oxo-3(E)-heptenyl]-2,3-dihydronaphthalen-1(4H)-one (68) | Antifungal                                      | Broth microdilution/ <i>C. albicans</i>                                                                         | 40 µg/mL (MIC)                  | Ketonazole 1.0 µg/mL (MIC)                                                               | [69]  |
|                                                                                            | Antifungal                                      | Broth microdilution/ <i>Tricophyton rubrum</i>                                                                  | 20 µg/mL (MIC)                  | Ketonazole 10.0 µg/mL (MIC)                                                              | [69]  |
|                                                                                            | Antifungal                                      | Broth microdilution/ <i>A. niger</i>                                                                            | 80 µg/mL (MIC)                  | Ketonazole 30.0 µg/mL (MIC)                                                              | [69]  |
| Balticol A (74)                                                                            | Antiviral                                       | Dye-uptake assay/ <i>Herpes simplex</i> virus type 1 (HSV-1, strain KOS)                                        | 1.0 µg/mL (IC <sub>50</sub> )   | Aciclovir 0.1 µg/mL (IC <sub>50</sub> )                                                  | [70]  |



|                                       |                   |                                                                                                                 |                                |                                                                                   |      |
|---------------------------------------|-------------------|-----------------------------------------------------------------------------------------------------------------|--------------------------------|-----------------------------------------------------------------------------------|------|
| Balticol B (75)                       | Antiviral         | Dye-uptake assay/Human influenza virus A/WSN/33 (H1N1)                                                          | 10.0 µg/mL (IC <sub>50</sub> ) | Amantadine SO <sub>4</sub> 15.0 µg/mL (IC <sub>50</sub> )                         | [70] |
|                                       |                   | Dye-uptake assay/ <i>Herpes simplex</i> virus type 1 (HSV-1, strain KOS)                                        | 1.0 µg/mL (IC <sub>50</sub> )  | Aciclovir 0.1 µg/mL (IC <sub>50</sub> )                                           | [70] |
| Balticol C (78)                       | Antiviral         | Dye-uptake assay/Human influenza virus A/WSN/33 (H1N1)                                                          | 1.0 µg/mL (IC <sub>50</sub> )  | Amantadine SO <sub>4</sub> 15.0 µg/mL (IC <sub>50</sub> )                         | [70] |
|                                       |                   | Dye-uptake assay/ <i>Herpes simplex</i> virus type 1 (HSV-1, strain KOS)                                        | 1.0 µg/mL (IC <sub>50</sub> )  | Aciclovir 0.1 µg/mL (IC <sub>50</sub> )                                           | [70] |
| Balticol D (80)                       | Antiviral         | Dye-uptake assay/Human influenza virus A/WSN/33 (H1N1)                                                          | 0.1 µg/mL (IC <sub>50</sub> )  | Amantadine SO <sub>4</sub> 15.0 µg/mL (IC <sub>50</sub> )                         | [70] |
|                                       |                   | Dye-uptake assay/ <i>Herpes simplex</i> virus type 1 (HSV-1, strain KOS)                                        | 0.1 µg/mL (IC <sub>50</sub> )  | Aciclovir 0.1 µg/mL (IC <sub>50</sub> )                                           | [70] |
| Balticol E (81)                       | Antiviral         | Dye-uptake assay/ <i>Herpes simplex</i> virus type 1 (HSV-1, strain KOS)                                        | 0.01 µg/mL (IC <sub>50</sub> ) | Aciclovir 0.1 µg/mL (IC <sub>50</sub> )                                           | [70] |
| Balticol F (82)                       | Antiviral         | Dye-uptake assay/Human influenza virus A/WSN/33 (H1N1)                                                          | 1.0 µg/mL (IC <sub>50</sub> )  | Amantadine SO <sub>4</sub> 15.0 µg/mL (IC <sub>50</sub> )                         | [70] |
|                                       |                   | Dye-uptake assay/ <i>Herpes simplex</i> virus type 1 (HSV-1, strain KOS)                                        | 0.1 µg/mL (IC <sub>50</sub> )  | Aciclovir 0.1 µg/mL (IC <sub>50</sub> )                                           | [70] |
| 9α-Hydroxyhalorosellinia A (85)       | Antimycobacterial | MABA/ <i>M. tuberculosis</i> H37 Ra                                                                             | 12.5 µg/mL (MIC)               | Rifampicin 0.047 µg/mL (MIC)<br>Kanamycin sulfate 1.25 µg/mL (MIC)                | [71] |
|                                       | Antimalarial      | Microculture radioisotope-[ <sup>3</sup> H]-hypoxanthine/ <i>P. falciparum</i> (K1, multidrug-resistant strain) | 7.94 µg/mL (IC <sub>50</sub> ) | Isoniazid 0.25 µg/mL (MIC)<br>Dihydroartemisinin 0.0012 mg/mL (IC <sub>50</sub> ) | [71] |
| 9S-hydroxydihydrodesoxybostrycin (89) | Antimycobacterial | MABA/ <i>Mycobacterium tuberculosis</i> H37 Ra                                                                  | 25.0 µg/mL (MIC)               | Rifampicin 0.047 µg/mL (MIC)<br>Kanamycin sulfate 1.25 µg/mL (MIC)                | [71] |

|                                             |                   |                                                     |                                 |                                                                                          |       |
|---------------------------------------------|-------------------|-----------------------------------------------------|---------------------------------|------------------------------------------------------------------------------------------|-------|
| Perenniporide A (90)                        | Antifungal        | Microplate assay/ <i>F. moniliforme</i>             | 20 µg/mL (MIC)                  | Isoniazid 0.25 µg/mL (MIC)                                                               |       |
|                                             | Antifungal        | Microplate assay/ <i>V. alboatrum</i>               | 20 µg/mL (MIC)                  | 2-Benzimidazolecarbamate 0.63 µg/mL (MIC)                                                | [73]  |
|                                             | Antifungal        | Microplate assay/ <i>Gibberella zeae</i>            | 20 µg/mL (MIC)                  | 2-Benzimidazolecarbamate 2.5 µg/mL (MIC)                                                 | [73]  |
|                                             | Antifungal        | Microplate assay/ <i>F. oxysporum</i>               | 10 µg/mL (MIC)                  | 2-Benzimidazolecarbamate 0.63 µg/mL (MIC)                                                | [73]  |
|                                             | Antifungal        | Microplate assay/ <i>A. longipes</i>                | 10 µg/mL (MIC)                  | -                                                                                        | [73]  |
| Dihydronaphthalenone (98)                   | Cytotoxicity      | Resazurin microplate/KB                             | 31.69 µg/mL (IC <sub>50</sub> ) | Doxorubicin 0.28 µg/mL (IC <sub>50</sub> )<br>Ellipticine 0.32 µg/mL (IC <sub>50</sub> ) | [75]  |
|                                             | Cytotoxicity      | Resazurin microplate/NCI-H187                       | 23.10 µg/mL (IC <sub>50</sub> ) | Doxorubicin 0.07 µg/mL (IC <sub>50</sub> )<br>Ellipticine 1.21 µg/mL (IC <sub>50</sub> ) | [75]  |
| Diastereomer-dihydronaphthalenone (99)      | Antimycobacterial | GFPMA/ <i>M. tuberculosis</i> H37 Ra                | 25.0 µg/mL (MIC)                | Isoniazid 0.03 µg/mL (MIC)                                                               | [75]  |
| 5-Hydroxydihydrofusarubin (105)             | Cytotoxicity      | Resazurin microplate/L1210                          | 9.4 µg/mL (IC <sub>50</sub> )   | -                                                                                        | [160] |
|                                             | Antibacterial     | Agar plate dilution/ <i>S. aureus</i>               | 100 µg/mL (MIC)                 | -                                                                                        |       |
|                                             | Antibacterial     | Agar plate dilution/ <i>B. subtilis</i>             | 100 µg/mL (MIC)                 | -                                                                                        | [160] |
|                                             | Antibacterial     | Agar plate dilution/ <i>S. pneumoniae</i>           | 50 µg/mL (MIC)                  | -                                                                                        | [160] |
|                                             | Antifungal        | Agar plate dilution/ <i>C. albicans</i>             | 100 µg/mL (MIC)                 | -                                                                                        | [160] |
|                                             | Antifungal        | Agar platedilution/ <i>Saccharomyces cerevisiae</i> | 50 µg/mL (MIC)                  | -                                                                                        | [160] |
| 5-Hydroxydihydrofusarubin A (106)           | Cytotoxicity      | Resazurin microplate/KB                             | 21.25 µg/mL (IC <sub>50</sub> ) | Doxorubicin 0.28 µg/mL (IC <sub>50</sub> )<br>Ellipticine 0.32 µg/mL (IC <sub>50</sub> ) | [75]  |
|                                             |                   | Resazurin microplate/MCF-7                          | 10.99 µg/mL (IC <sub>50</sub> ) | Doxorubicin 0.90 µg/mL (IC <sub>50</sub> )                                               | [75]  |
|                                             |                   | Resazurin microplate/NCI-H187                       | 12.14 µg/mL (IC <sub>50</sub> ) | Doxorubicin 0.07 µg/mL (IC <sub>50</sub> )<br>Ellipticine 1.21 µg/mL (IC <sub>50</sub> ) | [75]  |
|                                             |                   |                                                     |                                 |                                                                                          |       |
| 5-Hydroxy-3-methoxydihydrofusarubin A (109) | Antimycobacterial | GFPMA/ <i>M. tuberculosis</i> H37 Ra                | 50.0 µg/mL (MIC)                | Isoniazid 0.03 µg/mL (MIC)                                                               | [75]  |
|                                             | Cytotoxicity      | Resazurin microplate/KB                             | 25.48 µg/mL (IC <sub>50</sub> ) | Doxorubicin 0.28 µg/mL (IC <sub>50</sub> )<br>Ellipticine 0.32 µg/mL (IC <sub>50</sub> ) | [75]  |
|                                             | Cytotoxicity      | Resazurin microplate/MCF-7                          | 14.50 µg/mL (IC <sub>50</sub> ) | Doxorubicin 0.90 µg/mL (IC <sub>50</sub> )                                               | [75]  |

|                                     |                   |                                                          |                                 |                                                                                          |      |
|-------------------------------------|-------------------|----------------------------------------------------------|---------------------------------|------------------------------------------------------------------------------------------|------|
|                                     | Cytotoxicity      | Resazurin microplate/NCI-H187                            | 26.03 µg/mL (IC <sub>50</sub> ) | Doxorubicin 0.07 µg/mL (IC <sub>50</sub> )<br>Ellipticine 1.21 µg/mL (IC <sub>50</sub> ) | [75] |
| 5-Hydroxydihydrofusarubin B (111)   | Cytotoxicity      | Resazurin microplate/KB                                  | 31.50 µg/mL (IC <sub>50</sub> ) | Doxorubicin 0.28 µg/mL (IC <sub>50</sub> )<br>Ellipticine 0.32 µg/mL (IC <sub>50</sub> ) | [75] |
|                                     | Cytotoxicity      | Resazurin microplate/NCI-H187                            | 11.89 µg/mL (IC <sub>50</sub> ) | Doxorubicin 0.07 µg/mL (IC <sub>50</sub> )<br>Ellipticine 1.21 µg/mL (IC <sub>50</sub> ) | [75] |
| 5-Methoxydihydrofusarubin B (112)   | Cytotoxicity      | Resazurin microplate/KB                                  | 23.59 µg/mL (IC <sub>50</sub> ) | Doxorubicin 0.28 µg/mL (IC <sub>50</sub> )<br>Ellipticine 0.32 µg/mL (IC <sub>50</sub> ) | [75] |
|                                     | Cytotoxicity      | Resazurin microplate/MCF-7                               | 23.43 µg/mL (IC <sub>50</sub> ) | Doxorubicin 0.90 µg/mL (IC <sub>50</sub> )                                               | [75] |
|                                     | Cytotoxicity      | Resazurin microplate/NCI-H187                            | 13.47 µg/mL (IC <sub>50</sub> ) | Doxorubicin 0.07 µg/mL (IC <sub>50</sub> )<br>Ellipticine 1.21 µg/mL (IC <sub>50</sub> ) | [75] |
|                                     | Cytotoxicity      | Resazurin microplate/Vero                                | 28.26 µg/mL (IC <sub>50</sub> ) | Ellipticine 1.72 µg/mL (IC <sub>50</sub> )                                               | [75] |
| 5-Hydroxydihydrofusarubin C (114)   | Cytotoxicity      | Resazurin microplate/KB                                  | 9.34 µg/mL (IC <sub>50</sub> )  | Doxorubicin 0.28 µg/mL (IC <sub>50</sub> )<br>Ellipticine 0.32 µg/mL (IC <sub>50</sub> ) | [75] |
|                                     | Cytotoxicity      | Resazurin microplate/MCF-7                               | 16.58 µg/mL (IC <sub>50</sub> ) | Doxorubicin 0.90 µg/mL (IC <sub>50</sub> )                                               | [75] |
|                                     | Cytotoxicity      | Resazurin microplate/NCI-H187                            | 9.99 µg/mL (IC <sub>50</sub> )  | Doxorubicin 0.07 µg/mL (IC <sub>50</sub> )<br>Ellipticine 1.21 µg/mL (IC <sub>50</sub> ) | [75] |
|                                     | Cytotoxicity      | Resazurin microplate/Vero                                | 26.76 µg/mL (IC <sub>50</sub> ) | Ellipticine 1.72 µg/mL (IC <sub>50</sub> )                                               | [75] |
| Aspvanicin B (128)                  | Cytotoxicity      | MTT/L5178Y                                               | 22.8 µM (IC <sub>50</sub> )     | Kahalalide F 4.3 µM (IC <sub>50</sub> )                                                  | [89] |
| Phomonaphthalenone A (130)          | Cytotoxicity      | MTT/A549                                                 | 92.5 µg/mL (IC <sub>50</sub> )  | 5-Fluorouracil 75.0 µg/mL (IC <sub>50</sub> )                                            | [90] |
|                                     | Cytotoxicity      | MTT/MDA-MB-231                                           | 64.2 µg/mL (IC <sub>50</sub> )  | 5-Fluorouracil 47.0 µg/mL (IC <sub>50</sub> )                                            | [90] |
|                                     | Cytotoxicity      | MTT/PANC-1                                               | 52.7 µg/mL (IC <sub>50</sub> )  | 5-Fluorouracil 65.0 µg/mL (IC <sub>50</sub> )                                            | [90] |
|                                     | Anti-HIV          | Luciferase assay/293T cells                              | 11.6 µg/mL (IC <sub>50</sub> )  | Efavirenz 4.7 × 10 <sup>-4</sup> µg/mL (IC <sub>50</sub> )                               | [90] |
| Variabilone (134)                   | Antibacterial     | Microdilution resazurin/ <i>B. subtilis</i>              | 2.13 µg/mL (IC <sub>50</sub> )  | Kanamycin 0.36 µg/mL (IC <sub>50</sub> )                                                 | [76] |
| (4R,10S,4'S)-Leptothalenone B (139) | Anti-inflammatory | Griess assay/LPS-activated NO production/ RAW264.7 cells | 44.5 µM (IC <sub>50</sub> )     | Indomethacin 37.5 µM (IC <sub>50</sub> )                                                 | [91] |
| Cladosporol C (147)                 | Cytotoxicity      | Trypan blue-cell viability assay/K562                    | >30.0 µM (IC <sub>50</sub> )    | Trichostatin A 0.24 µM (IC <sub>50</sub> )                                               | [77] |
|                                     |                   | Trypan blue-cell viability assay/A549                    | 33.9 µM (IC <sub>50</sub> )     | Trichostatin A 0.05 µM (IC <sub>50</sub> )                                               | [77] |
|                                     |                   | Trypan blue-cell viability assay/Huh-7                   | >30.0 µM (IC <sub>50</sub> )    | Trichostatin A 0.08 µM (IC <sub>50</sub> )                                               | [77] |
|                                     |                   | Trypan blue-cell viability assay/H1975                   | 45.6 µM (IC <sub>50</sub> )     | Trichostatin A 0.09 µM (IC <sub>50</sub> )                                               | [77] |

|                     |                       |                                                                |                                             |                                                                                                       |      |
|---------------------|-----------------------|----------------------------------------------------------------|---------------------------------------------|-------------------------------------------------------------------------------------------------------|------|
| Antimicrobial       |                       | Trypan blue-cell viability assay/MCF-7                         | >30.0 $\mu\text{M}$ ( $\text{IC}_{50}$ )    | Trichostatin A 0.78 $\mu\text{M}$ ( $\text{IC}_{50}$ )                                                | [77] |
|                     |                       | Trypan blue-cell viability assay/U937                          | >30.0 $\mu\text{M}$ ( $\text{IC}_{50}$ )    | Trichostatin A 0.06 $\mu\text{M}$ ( $\text{IC}_{50}$ )                                                | [77] |
|                     |                       | Trypan blue cell viability assay/BGC823                        | >30.0 $\mu\text{M}$ ( $\text{IC}_{50}$ )    | Trichostatin A 0.09 $\mu\text{M}$ ( $\text{IC}_{50}$ )                                                | [77] |
|                     |                       | Trypan blue cell viability assay/HL-60                         | 72.5 $\mu\text{M}$ ( $\text{IC}_{50}$ )     | Trichostatin A 0.09 $\mu\text{M}$ ( $\text{IC}_{50}$ )                                                | [77] |
|                     |                       | Trypan blue cell viability assay/A549                          | >30.0 $\mu\text{M}$ ( $\text{IC}_{50}$ )    | Trichostatin A 0.11 $\mu\text{M}$ ( $\text{IC}_{50}$ )                                                | [77] |
|                     |                       | Trypan blue cell viability assay/MOLT-4                        | 14.4 $\mu\text{M}$ ( $\text{IC}_{50}$ )     | Trichostatin A 0.03 $\mu\text{M}$ ( $\text{IC}_{50}$ )                                                | [77] |
|                     |                       | MTT/A549                                                       | 14.0 $\mu\text{M}$ ( $\text{IC}_{50}$ )     | Cisplatin 1.3 $\mu\text{M}$ ( $\text{IC}_{50}$ )                                                      | [78] |
|                     |                       | MTT/HeLa                                                       | 4.0 $\mu\text{M}$ ( $\text{IC}_{50}$ )      | Paclitaxel 4.9 $\mu\text{M}$ ( $\text{IC}_{50}$ )                                                     | [78] |
|                     |                       | Microplate assay/ <i>E. coli</i>                               | 8.0 $\mu\text{g/mL}$ (MIC)                  | Chloramphenicol 0.025 $\mu\text{g/mL}$ (MIC)                                                          | [78] |
|                     |                       | Microplate assay/ <i>M. luteus</i>                             | 32.0 $\mu\text{g/mL}$ (MIC)                 | Chloramphenicol 0.5 $\mu\text{g/mL}$ (MIC)                                                            | [78] |
|                     |                       | Microplate assay/ <i>V. harveyi</i>                            | 16.0 $\mu\text{g/mL}$ (MIC)                 | Chloramphenicol 2.0 $\mu\text{g/mL}$ (MIC)                                                            | [78] |
|                     |                       | Microplate assay/ <i>S. aureus</i>                             | 6.25 $\mu\text{g/mL}$ (MIC)                 | Ciprofloxacin 0.39 $\mu\text{g/mL}$ (MIC)                                                             | [79] |
|                     |                       | Microplate assay/ <i>M. luteus</i>                             | 12.5 $\mu\text{g/mL}$ (MIC)                 | Ciprofloxacin 0.39 $\mu\text{g/mL}$ (MIC)                                                             | [79] |
| Cladosporol D (148) | Anti-inflammatory     | Spectrophotometry/Anti-COX-2/ $\text{PGF}_{2\alpha}$ inhibitor | 60.2 $\mu\text{M}$ ( $\text{IC}_{50}$ )     | Indomethacin 18.3 $\mu\text{M}$ ( $\text{IC}_{50}$ )<br>NS-398 1.0 $\mu\text{M}$ ( $\text{IC}_{50}$ ) | [77] |
| Cladosporol E (149) | Insecticidal activity | Measuring the corrected mortality (CM)                         | 150.0 $\mu\text{g/mL}$ ( $\text{IC}_{50}$ ) | Azadirachtin 25.0 $\mu\text{g/mL}$ ( $\text{IC}_{50}$ )                                               | [79] |
| Cladosporol F (150) | Antimicrobial         | Microplate assay/ <i>S. aureus</i>                             | 1.56 $\mu\text{g/mL}$ (MIC)                 | Ciprofloxacin 0.39 $\mu\text{g/mL}$ (MIC)                                                             | [79] |
|                     |                       | Microplate assay/ <i>M. luteus</i>                             | 12.5 $\mu\text{g/mL}$ (MIC)                 | Ciprofloxacin 0.39 $\mu\text{g/mL}$ (MIC)                                                             | [79] |
|                     | Cytotoxicity          | MTT/K562                                                       | 23.0 $\mu\text{M}$ ( $\text{IC}_{50}$ )     | Doxorubicin 0.6 $\mu\text{M}$ ( $\text{IC}_{50}$ )                                                    | [95] |
|                     |                       | SRB/HeLa                                                       | 13.8 $\mu\text{M}$ ( $\text{IC}_{50}$ )     | Doxorubicin 0.5 $\mu\text{M}$ ( $\text{IC}_{50}$ )                                                    | [95] |
|                     |                       | SRB/HCT-116                                                    | 23.0 $\mu\text{M}$ ( $\text{IC}_{50}$ )     | Doxorubicin 0.2 $\mu\text{M}$ ( $\text{IC}_{50}$ )                                                    | [95] |
|                     |                       | MTT/A549                                                       | 15.0 $\mu\text{M}$ ( $\text{IC}_{50}$ )     | Cisplatin 1.3 $\mu\text{M}$ ( $\text{IC}_{50}$ )                                                      | [78] |
|                     |                       | MTT/HeLa                                                       | 10.0 $\mu\text{M}$ ( $\text{IC}_{50}$ )     | Paclitaxel 4.9 $\mu\text{M}$ ( $\text{IC}_{50}$ )                                                     | [78] |
| Antimicrobial       |                       | Microplate assay/ <i>E. coli</i>                               | 32.0 $\mu\text{g/mL}$ (MIC)                 | Chloramphenicol 0.025 $\mu\text{g/mL}$ (MIC)                                                          | [78] |
|                     |                       | Microplate assay/ <i>M. luteus</i>                             | 64.0 $\mu\text{g/mL}$ (MIC)                 | Chloramphenicol 0.5 $\mu\text{g/mL}$ (MIC)                                                            | [78] |

|                     |               |                                     |                             |                                         |      |
|---------------------|---------------|-------------------------------------|-----------------------------|-----------------------------------------|------|
|                     |               | Microplate assay/ <i>V. harveyi</i> | 32.0 µg/mL (MIC)            | Chloramphenicol 2.0 µg/mL (MIC)         | [78] |
| Cladosporol G (151) | Cytotoxicity  | MTT/K562                            | 8.8 µM (IC <sub>50</sub> )  | Doxorubicin 0.6 µM (IC <sub>50</sub> )  | [95] |
|                     |               | SRB/HeLa                            | 3.9 µM (IC <sub>50</sub> )  | Doxorubicin 0.5 µM (IC <sub>50</sub> )  | [95] |
|                     |               | SRB/HCT-116                         | 19.4 µM (IC <sub>50</sub> ) | Doxorubicin 0.2 µM (IC <sub>50</sub> )  | [95] |
| Cladosporol G (152) | Cytotoxicity  | MTT/A549                            | 13.0 µM (IC <sub>50</sub> ) | Cisplatin 1.3 µM (IC <sub>50</sub> )    | [78] |
|                     |               | MTT/H446                            | 11.0 µM (IC <sub>50</sub> ) | Adriamycin 4.0 µM (IC <sub>50</sub> )   | [78] |
|                     |               | MTT/Huh7                            | 10.0 µM (IC <sub>50</sub> ) | Fluorouracil 6.2 µM (IC <sub>50</sub> ) | [78] |
|                     |               | MTT/L02                             | 11.0 µM (IC <sub>50</sub> ) | Cisplatin 13.0 µM (IC <sub>50</sub> )   | [78] |
|                     |               | MTT/LM3                             | 14.0 µM (IC <sub>50</sub> ) | Cisplatin 9.1 µM (IC <sub>50</sub> )    | [78] |
|                     |               | MTT/SW1990                          | 15.0 µM (IC <sub>50</sub> ) | Gemcitabine 2.2 µM (IC <sub>50</sub> )  | [78] |
|                     | Antimicrobial | Microplate assay/ <i>E. coli</i>    | 64.0 µg/mL (MIC)            | Chloramphenicol 0.025 µg/mL (MIC)       | [78] |
|                     |               | Microplate assay/ <i>M. luteus</i>  | 128.0 µg/mL (MIC)           | Chloramphenicol 0.5 µg/mL (MIC)         | [78] |
|                     |               | Microplate assay/ <i>V. harveyi</i> | 64.0 µg/mL (MIC)            | Chloramphenicol 2.0 µg/mL (MIC)         | [78] |
| Cladosporol H (153) | Cytotoxicity  | MTT/A549                            | 5.0 µM (IC <sub>50</sub> )  | Cisplatin 1.3 µM (IC <sub>50</sub> )    | [78] |
|                     |               | MTT/H446                            | 10.0 µM (IC <sub>50</sub> ) | Adriamycin 4.0 µM (IC <sub>50</sub> )   | [78] |
|                     |               | MTT/Huh7                            | 1.0 µM (IC <sub>50</sub> )  | Fluorouracil 6.2 µM (IC <sub>50</sub> ) | [78] |
|                     |               | MTT/LM3                             | 4.1 µM (IC <sub>50</sub> )  | Cisplatin 9.1 µM (IC <sub>50</sub> )    | [78] |
|                     |               | MTT/MCF-7                           | 10.0 µM (IC <sub>50</sub> ) | Paclitaxel 1.8 µM (IC <sub>50</sub> )   | [78] |
|                     |               | MTT/SW1990                          | 15.0 µM (IC <sub>50</sub> ) | Gemcitabine 2.2 µM (IC <sub>50</sub> )  | [78] |
|                     | Antimicrobial | Microplate assay/ <i>E. coli</i>    | 32.0 µg/mL (MIC)            | Chloramphenicol 0.025 µg/mL (MIC)       | [78] |
|                     |               | Microplate assay/ <i>M. luteus</i>  | 64.0 µg/mL (MIC)            | Chloramphenicol 0.5 µg/mL (MIC)         | [78] |
|                     |               | Microplate assay/ <i>V. harveyi</i> | 4.0 µg/mL (MIC)             | Chloramphenicol 2.0 µg/mL (MIC)         | [78] |
| Cladosporol I (154) | Cytotoxicity  | MTT/HeLa                            | 10.8 µM (IC <sub>50</sub> ) | Paclitaxel 4.9 µM (IC <sub>50</sub> )   | [78] |
|                     | Antimicrobial | Microplate assay/ <i>E. coli</i>    | 64.0 µg/mL (MIC)            | Chloramphenicol 0.025 µg/mL (MIC)       | [78] |
|                     |               | Microplate assay/ <i>M. luteus</i>  | 64.0 µg/mL (MIC)            | Chloramphenicol 0.5 µg/mL (MIC)         | [78] |
|                     |               | Microplate assay/ <i>V. harveyi</i> | 16.0 µg/mL (MIC)            | Chloramphenicol 2.0 µg/mL (MIC)         | [78] |

|                      |                   |                                                                            |                                  |                                                 |      |
|----------------------|-------------------|----------------------------------------------------------------------------|----------------------------------|-------------------------------------------------|------|
| Cladosporol J (155)  | Cytotoxicity      | MTT/A549                                                                   | 15.0 $\mu$ M (IC <sub>50</sub> ) | Cisplatin 1.3 $\mu$ M (IC <sub>50</sub> )       | [78] |
|                      |                   | MTT/H446                                                                   | 11.0 $\mu$ M (IC <sub>50</sub> ) | Adriamycin 4.0 $\mu$ M (IC <sub>50</sub> )      | [78] |
|                      |                   | MTT/HeLa                                                                   | 15.0 $\mu$ M (IC <sub>50</sub> ) | Paclitaxel 4.9 $\mu$ M (IC <sub>50</sub> )      | [78] |
|                      |                   | MTT/Huh7                                                                   | 20.0 $\mu$ M (IC <sub>50</sub> ) | Fluorouracil 6.2 $\mu$ M (IC <sub>50</sub> )    | [78] |
|                      | Antimicrobial     | MTT/MCF-7                                                                  | 12.0 $\mu$ M (IC <sub>50</sub> ) | Paclitaxel 1.8 $\mu$ M (IC <sub>50</sub> )      | [78] |
|                      |                   | Microplate assay/ <i>E. coli</i>                                           | 16.0 $\mu$ g/mL (MIC)            | Chloramphenicol 0.025 $\mu$ g/mL (MIC)          | [78] |
|                      |                   | Microplate assay/ <i>M. luteus</i>                                         | 64.0 $\mu$ g/mL (MIC)            | Chloramphenicol 0.5 $\mu$ g/mL (MIC)            | [78] |
|                      |                   | Microplate assay/ <i>V. harveyi</i>                                        | 32.0 $\mu$ g/mL (MIC)            | Chloramphenicol 2.0 $\mu$ g/mL (MIC)            | [78] |
| Cladosporone A (157) | Cytotoxicity      | Trypan blue cell viability assay/K562                                      | 14.3 $\mu$ M (IC <sub>50</sub> ) | Trichostatin A 0.24 $\mu$ M (IC <sub>50</sub> ) | [77] |
|                      |                   | Trypan blue cell viability assay/A549                                      | 15.7 $\mu$ M (IC <sub>50</sub> ) | Trichostatin A 0.05 $\mu$ M (IC <sub>50</sub> ) | [77] |
|                      |                   | Trypan blue cell viability assay/Huh-7                                     | 29.9 $\mu$ M (IC <sub>50</sub> ) | Trichostatin A 0.08 $\mu$ M (IC <sub>50</sub> ) | [77] |
|                      |                   | Trypan blue cell viability assay/H1975                                     | 40.6 $\mu$ M (IC <sub>50</sub> ) | Trichostatin A 0.09 $\mu$ M (IC <sub>50</sub> ) | [77] |
|                      |                   | Trypan blue cell viability assay/MCF-7                                     | 21.3 $\mu$ M (IC <sub>50</sub> ) | Trichostatin A 0.78 $\mu$ M (IC <sub>50</sub> ) | [77] |
|                      |                   | Trypan blue cell viability assay/U937                                      | 10.5 $\mu$ M (IC <sub>50</sub> ) | Trichostatin A 0.06 $\mu$ M (IC <sub>50</sub> ) | [77] |
|                      |                   | Trypan blue cell viability assay/BGC823                                    | 17.0 $\mu$ M (IC <sub>50</sub> ) | Trichostatin A 0.09 $\mu$ M (IC <sub>50</sub> ) | [77] |
|                      |                   | Trypan blue cell viability assay/HL-60                                     | 10.1 $\mu$ M (IC <sub>50</sub> ) | Trichostatin A 0.09 $\mu$ M (IC <sub>50</sub> ) | [77] |
|                      |                   | Trypan blue cell viability assay/A549                                      | 53.7 $\mu$ M (IC <sub>50</sub> ) | Trichostatin A 0.11 $\mu$ M (IC <sub>50</sub> ) | [77] |
|                      |                   | Trypan blue cell viability assay/MOLT-4                                    | 14.6 $\mu$ M (IC <sub>50</sub> ) | Trichostatin A 0.03 $\mu$ M (IC <sub>50</sub> ) | [77] |
|                      | Anti-inflammatory | Spectrophotometry/Anti-COX-2/PGF <sub>2<math>\alpha</math></sub> inhibitor | 49.1 $\mu$ M (IC <sub>50</sub> ) | Indomethacin 18.3 $\mu$ M (IC <sub>50</sub> )   | [77] |
|                      |                   |                                                                            |                                  | NS-398 1.0 $\mu$ M (IC <sub>50</sub> )          |      |

118. References Hemingway, R.W.; McGraw, G.W.; Barras, S.J. Polyphenols in *Ceratocystis minor* infected *Pinus taeda*: Fungal metabolites, phloem and xylem phenols. *J. Agric. Food Chem.* 1977, 25, 717–723.
119. - Stipanovic, R.D.; Bell, A.A. Pentaketide metabolites of *Verticillium dahliae*. II. Accumulation of naphthol derivatives by the aberrant-melanin mutant BRM-2. *Mycologia* 1977, 69, 164–172.

120. Ayer, W.A.; Browne, L.M.; Lin, G. Metabolites of *Leptographium wagneri*, the causative agent of black stain root disease of conifers. *J. Nat. Prod.* 1989, 52, 1, 119–129.
121. Borgschulte, K.; Rebuffat, S.; Trowitzsch-Kienast, W.; Schomburg, D.; Pinon, J.; Bodo, B. Isolation and structure elucidation of hymatoxins B - E and other phytotoxins from *Hypoxylon mammatum* fungal pathogen of leuce poplars. *Tetrahedron* 1991, 47, 8351–8360.
122. Tabuchi, H.; Tajimi, A.; Ichihara, A. Phytotoxic metabolites isolated from *Scolecotrichum graminis* Fuckel. *Biosci. Biotech. Biochem.* 1994, 58, 1956–1959.
123. Trisuwan, K.; Rukachaisirikul, V.; Sukpondma, Y.; Preedanon, S.; Phongpaichit, S.; Rungjindamai, N.; Sakayaroj, J. Epoxydons and a pyrone from the marine-derived fungus *Nigrospora* sp. PSU-F5. *J. Nat. Prod.* 2008, 71, 1323–1326.
124. Arunpanichlert, J.; Rukachaisirikul, V.; Phongpaichit, S.; Supaphon, O.; Sakayaroj, J. Xylariphilone: a new azaphilone derivative from the seagrass-derived fungus *Xylariales* sp. PSU-ES163. *Nat. Prod. Res.* 2016, 30, 46–51.
125. Fan, C.; Zhou, G.; Wang, W.; Zhang, G.; Zhu, T.; Che, Q.; Li, D. Tetralone derivatives from a deep-sea derived fungus *Cladosporium* sp. HDN17-58. *Nat. Prod. Commun.* 2021, 16, 1–4.128.
126. Sviridov, S.I. Secondary metabolites of *Pyricularia oryzae*. *Chem. Nat. Compd.* 1991, 27, 410–413.
127. Zhang, Y.; Feng, Y.; Kramer, M.; Essmann, F.; Grond, S. A New Acetylenic compound and other bioactive metabolites from a shark gill-derived *Penicillium* strain. *Rec. Nat. Prod.* 2017, 11, 31–36.
128. Quang, T.H.; Huong, P.T.M.; Ngan, N.T.T.; Hanh, T.T.H.; Cuong, N.X.; Nam, N.H.; Minh, C.V. Secondary metabolites from a marine sponge-associated fungus *Xenomyrothecium* sp. IMBC-FP2.11. *Vietnam J. Chem.* 2020, 58, 752–758.
129. Iwasaki, S.; Muro, H.; Sasaki, K.; Nozoe, S.; Okuda, S.; Sato, Z. Isolations of phytotoxic substances produced by *pyricularia oryzae cavara*, *Tetrahedron Lett.* 1973, 14, 3537–3542.
130. Krohn, K.; Biele, C.; Drogies, K.H.; Steingrover, K.; Aust, H.J.; Draeger, S.; Schulz, B. Fusidilactones, a new group of polycyclic lactones from an endophyte, *Fusidium* sp. *Eur. J. Org. Chem.* 2002, 14, 2331–2336.
131. Yamaguchi, Y.; Masuma, R.; Kim, Y.-P.; Uchida, R.; Tomoda, H.; Omura, S. Taxonomy and secondary metabolites of *Pseudobotrytis* sp. FKA-25. *Mycoscience* 2004, 45, 9–16.
132. Mancilla, G.; Jiménez-Teja, D.; Femenía-Rios, M.; Macías-Sánchez, A.J.; Collado, I.G.; Hernández-Galán, R. Novel macrolide from wild strains of the phytopathogen Fungus *Colletotrichum acutatum*. *Nat. Prod. Commun.* 2009, 4, 395–398.
133. Ouchbani, T.; Zouihri, H.; Essassi, E.; Proksch, P.; Ng, S.W. (3R,4S)-3,4,8-Trihydroxy-1,2,3,4-tetrahydronaphthalen-1-one monohydrate from *Embellisia eureka*. *Acta Cryst.* 2012, E68, o1874.
134. Nong, X.H.; Zheng, Z.H.; Zhang, X.Y.; Lu, X.H.; Qi, S.H. Polyketides from a marine-derived fungus *Xylariaceae* sp. *Mar. Drugs* 2013, 11, 1718–1727.137.
135. Venkatasubbaiah, P.; Chilton, W.S.J. Toxins produced by the Dogwood Anthracnose fungus *Discula* sp. *J. Nat. Prod.* 1991, 54, 1293–1297.
136. Höller, U.; König, G.M.; Wright, A.D. Three new metabolites from marine-derived fungi of the genera *coniothyrium* and *microsphaeropsis*. *J. Nat. Prod.* 1999, 62, 114–118.
137. Xie, F.; Chang, W.; Zhang, M.; Li, Y.; Li, W.; Shi, H.; Zheng, S.; Lou, H. Quinone derivatives isolated from the endolichenic fungus *Phialocephala fortinii* are Mdr1 modulators that combat azole resistance in *Candida albicans*. *Sci. Rep.* 2016, 6, 33687.
138. De Souza, E.M.C.; Da Silva, E.L.; Marinho, A.M.R.; Marinho, P.S.B. (4S)-4,8-dihydroxy-1-tetralone and other chemical constituents from *Pestalotiopsis* sp. EJC07, endophytic from *Bauhinia guianensis*. *An. Acad. Bras. Ciênc.* 2016, 88, 29–33.
139. Hsiao, Y.; Cheng, M.J.; Chang, H.S.; Wu, M.D.; Hsieh, S.Y.; Liu, T.W.; Lin, C.H. Yuan, G.F.; Chen, I.S. Six new metabolites produced by *Colletotrichum aotearoa* 09F0161, an endophytic fungus isolated from *Bredia oldhamii*. *Nat. Prod. Res.* 2016, 30, 251–258.
140. Kokubun, T.; Veitch, N.C.; Bridge, P.D.; Simmonds, M.S.J. Dihydroisocoumarins and a tetralone from *Cytospora eucalypticola*. *Phytochemistry* 2003, 62, 779–782.
141. Gallo, M.B.C.; Cavalcanti, B.C.; Barros, F.W.; de Moraes, M.O.; Costa-Lotufo, L.V.; Pessoa, C.; Bastos, J.K.; Pupo, M.T. Chemical constituents of *Papulaspora immersa*, an endophyte from *Smallanthus sonchifolius* (Asteraceae), and their cytotoxic activity. *Chem. Biodivers.* 2010, 7, 2941–2950.
142. Evidente, A.; Punzo, B.; Andolfi, A.; Cimmino, A.; Melck, D.; Luque, J. Lipophilic phytotoxins produced by *Neofusicoccum parvum*, a grapevine canker agent. *Phytopathol. Mediterr.* 2010, 49, 74–79.
143. El-Elmat, T.; Raja, H.A.; Figueroa, M.; Falkinham, J.O.; Oberlies, N.H. Isochromenones, isobenzofuranone, and tetrahydronaphthalenes produced by *Paraphoma radicina*, a fungus isolated from a freshwater habitat. *Phytochemistry* 2014, 104, 114–120.

144. Sadorn, K.; Saepua, S.; Boonyuen, N.; Boonruangprapa, T.; Rachtawee, P.; Pittayakhajonwut, P. Antimicrobial activity and cytotoxicity of xanthoquinodin analogs from the fungus *Cytospora eugeniae* BCC42696. *Phytochemistry* **2018**, *151*, 99–109.
145. Yang, H.X.; Peng, X.P.; Gao, H.; Zhang, H.M.; Wang, Z.R.; Li, G.; Lou, H.X. Pleosporalins H and I, two new heptaketides from the endophytic fungus *Pleosporales* sp. F46 by using OSMAC strategy. *Nat. Prod. Res.* **2021**, *35*, 13307–3313.
146. Yang, X.-Y.; Zhang, J.-X.; Ding, Q.-Y.; He, Z.-C.; Zhu, C.-Y.; Zhang, K.-Q.; Niu, X.-M. Metabolites from two dominant thermophilic fungal species *Thermomyces lanuginosus* and *Scytalidium thermophilum*. *Chem. Biodivers.* **2020**, *17*, e2000137.
147. Sato, H.; Takishima, T.; Otomo, N.; Sakamura, S. Phytotoxins produced by the fungus of the larch shoot blight. *Nippon Nôgeikagaku Kaishi.* **1982**, *56*, 649–653.151.
148. Luo, G.; Chen, S.; Yu, J.; Yuan, J.; Zheng, L.; Liu, L.; Chen, B.; Li, J. Naphthalenones and naphthols isolated from the *Saussurea laniceps* endophytic fungus *Didymella glomerata* X223. *Chem. Biodivers.* **2020**, *17*, e2000315.
149. Bell, A.A.; Stipanovic, R.D.; Puhalla, J.E. Pentaketide metabolites of *Verticillium dahliae*: Identification of (+)-scytalone as a natural precursor to melanin. *Tetrahedron* **1976**, *32*, 1353–1356.
150. Liu, Y.; Stuhldreier, F.; Kurtan, T.; Mandi, A.; Arumugam, S.; Lin, W.; Stork, B.; Wesselborg, S.; Weber, H.; Henrich, B.; Daletos, G.; Proksch, P. Daldinone derivatives from the mangrove-derived endophytic fungus *Annulohypoxylon* sp. *RSC Adv.* **2017**, *7*, 5381–5393.
151. Zhang, J.; Liang, J.H.; Zhao, J.C.; Wang, Y.L.; Dong, P.P.; Liu, X.G.; Zhang, T.Y.; Wu, Y.Y.; Shang, D.J.; Zhang, Y.X.; Sun, C.P. Xylarianins A–D from the endophytic fungus *Xylaria* sp. SYPF 8246 as natural inhibitors of human carboxylesterase 2. *Bioorg. Chem.* **2018**, *81*, 350–355.
152. Padumadasa, C.; Xu, Y.M.; Wijeratne, E.M.K.; Espinosa-Artiles, P.; U'Ren, J.M.; Arnold, A.E.; Gunatilaka, A.A.L. Cytotoxic and noncytotoxic metabolites from *Teratosphaeria* sp. FL2137, a fungus associated with *Pinus clausa*. *J. Nat. Prod.* **2018**, *81*, 616–624.
153. Bartman, C.D.; Campbell, I.M. Naphthalenone production in *Aspergillus parvulus*. *Can. J. Microbiol.* **1979**, *25*, 130–137.
154. Hao, G.; Qing-Hua, Z.; Miao-Miao, J.; Jin-Shan, T.; Cheng-Du, M.; Kui, H.; Michio, N.; Nai-Li, W.; Xin-Sheng, Y. Polyketides from a marine sponge-derived fungus *Mycelia sterilia* and proton-proton long-range coupling. *Magn. Reson. Chem.* **2008**, *46*, 1148–1152.
155. Rivera-Chávez, J.; El-Elmat, T.; Gallagher, J.M.; Graf, T.N.; Fournier, J.; Panigrahi, G.K.; Deep, G.; Bunch, R.L.; Raja, H.A.; Oberlies, N.H. Delitpyrones:  $\alpha$ -Pyrone derivatives from a freshwater *Delitschia* sp. *Planta Med.* **2019**, *85*, 62–71.
156. Wu, Z.-C.; Li, D.-L.; Chen, Y.-C.; Zhang, W.-M. A new isofuranonaphthalenone and benzopyrans from the endophytic fungus *Nodulisporium* sp. A4 from *Aquilaria sinensis*. *Helv. Chim. Acta.* **2010**, *93*, 920–924.
157. Zhou, Y.H.; Zhang, M.; Zhu, R.X.; Zhang, J.Z.; Xie, F.; Li, X.B.; Chang, W.Q.; Wang, X.N.; Zhao, Z.T.; Lou, H.X. Heptaketides from an endolichenic fungus *Biatrispora* sp. and their antifungal activity. *J. Nat. Prod.* **2016**, *79*, 2149–2157.
158. Ariefta, N.R.; Nikmawahda, H.T.; Koseki, T.; Shiono, Y. Fusopoltides B–E, new polyketides isolated from *Fusarium solani* B-18 *Tetrahedron Lett.* **2019**, *60*, 151361.
159. Niu, S.; Tang, X.X.; Fan, Z.; Xia, J.M.; Xie, C.L.; Yang, X.W. Fusarisolins A–E, polyketides from the marine-derived fungus *Fusarium solani* H918. *Mar. Drugs* **2019**, *17*, 125.
160. Itsuo, K.; Shunji, S.; Akihiko, M.; Akio, F. 5-Hydroxydihydrofusarubin, a process for its preparation and its use as a medicament. *European Patent Application* 0234431 A2, **1987**.
161. Wen, Y.; Lv, Y.; Hao, J.; Chen, H.; Huang, Y.; Liu, C.; Huang, H.; Ma, Y.; Yang, X. Two new compounds of *Penicillium polonicum*, an endophytic fungus from *Camptotheca acuminata* Decne. *Nat. Prod. Res.* **2020**, *34*, 1879–1883.
162. Stodůlková, E.; Man, P.; Kuzma, M.; Černý, J.; Císařová, I.; Kubátová, A.; Chudičková, M.; Kolařík, M.; Flieger, M. A highly diverse spectrum of naphthoquinone derivatives produced by the endophytic fungus *Biatrispora* sp. CCF 4378. *Folia Microbiol. (Praha).* **2015**, *60*, 259–267.
163. Sakagami, Y.; Sano, A.; Marumo, S.; Yoshikawa, N.; Nakagawa, J. Cladosporol, a plant growth regulator produced by fungus *Cladosporium cladosporioides*. *Symposium on the chemistry of natural products* **1992**, 134–141. [https://doi.org/10.24496/tennenyuki.34.0\\_134](https://doi.org/10.24496/tennenyuki.34.0_134).
164. Sakagami, Y.; Sano, A.; Hara, O.; Mikawa, T.; Marumo, S. Cladosporol,  $\beta$ -1,3-glucan biosynthesis inhibitor, isolated from fungus, *Cladosporium cladosporioides*. *Tetrahedron Lett.* **1995**, *36*, 1469–1472.
165. Zurlo, D.; Ziccardi, P.; Votino, C.; Colangelo, T.; Cerchia, C.; Dal Piaz, F.; Dallavalle, S.; Moricca, S.; Novellino, E.; Lavecchia, A.; Colantuoni, V.; Lupo, A. The antiproliferative and proapoptotic effects of cladosporols A and B are related to their different binding mode as PPAR $\gamma$  ligands. *Biochem. Pharmacol.* **2016**, *108*, 22–35.



- 
166. Nasini, G.; Arnone, A.; Assante, G.; Bava, A.; Moricca, S.; Ragazzi, A. Secondary mould metabolites of *Cladosporium tenuissimum*, a hyperparasite of rust fungi. *Phytochemistry* **2004**, *65*, 2107–2111.
167. Yamazaki, H.; Yagi, A.; Akaishi, M.; Kirikoshi, R.; Takahashi, O.; Abe, T.; Chiba, S.; Takahashi, K.; Iwakura, N.; Namikoshi, M.; Uchida, R. Halogenated cladosporols produced by the sodium halide-supplemented fermentation of the plant-associated fungus *Cladosporium* sp. T MPU1621. *Tetrahedron Lett.* **2018**, *59*, 1913–1915.
168. Zhen, F.; Zhang-hua, S.; Yu-chan, C.; Hao-hua L.; Wei-min Z. Cladosperanol A, a new dimeric tetralone from marine-derived fungus *cladosporium perangustum*. *Nat. Prod. Res. Dev.* **2016**, *28*, 486–489.
